# Supplementary material for: Sustainable synthesis of 1,8-dioxooctahydroxanthenes in deep eutectic solvents (DESs)
Source: Royal Society of Chemistry journal article supplement (doi:10.1039/d1nj00743b), 2021-01-01
Supplement: d1nj00743b1.pdf [file d1nj00743b1.pdf]

*Supporting information*

*for*

**Sustainable synthesis of 1, 8- Dioxooctahydroxanthenes in deep eutectic solvents (DES)**

M. Shaibuna<sup>a</sup>, Anshad Abbas<sup>b</sup>, Muhammed Jeneesh K. K<sup>c</sup>. and K. Sreekumar<sup>a\*</sup>

<sup>a</sup>Department of Applied Chemistry, Cochin University of Science and Technology, Cochin-22, India

<sup>b</sup>Department of Physics, Cochin University of Science and Technology, Cochin-22, India

<sup>c</sup>Department of Chemistry, Pondicherry University, R V Nagar, Kalapet, Puducherry 605 014, India

\* E-mail: [kspolymer.cusat@gmail.com](mailto:kspolymer.cusat@gmail.com)

| Entry | Content                                                                            | Page no |
|-------|------------------------------------------------------------------------------------|---------|
| 1     | Methods used                                                                       | 1       |
| 2     | Structures of synthesised products                                                 | 2       |
| 3     | Spectral data of the synthesised products                                          | 2-6     |
| 4     | GC- MS, <sup>1</sup> H and <sup>13</sup> C NMR spectra of the synthesised products | 7-32    |
|       | References                                                                         | 33      |

• **Methods used**

GC-MS analysis was carried out on a 1200 L single Quadruple, Varian Gas Chromatograph model with mass detector. <sup>1</sup>H and <sup>13</sup>C NMR Spectra were recorded on Bruker 400 MHz instrument with TMS as internal standard in CDCl<sub>3</sub> (IIRBS, MG University, Kottayam). Absorption spectra were recorded using Thermo Scientific Evolusion 220 spectrophotometer in 200-900 nm range. Fluorescence measurements were carried out using Horiba Fluorolog 3 (FL-1057). The capacitance was measured using a HP 4277A LCZ meter operating with a frequency of 10 kHz.

### Structures of the synthesised products

|                                                                                     |                                                                                     |                                                                                     |                                                                                     |
|-------------------------------------------------------------------------------------|-------------------------------------------------------------------------------------|-------------------------------------------------------------------------------------|-------------------------------------------------------------------------------------|
| 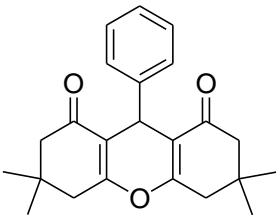   |    |   |  |
| X1                                                                                  | X2                                                                                  | X3                                                                                  | X4                                                                                  |
|    |    |   |  |
| X5                                                                                  | X6                                                                                  | X7                                                                                  | X8                                                                                  |
|  |  |  |                                                                                     |
| X9                                                                                  | X10                                                                                 | X11                                                                                 |                                                                                     |

### Spectral data of the synthesised products

#### 1. 3,3,6,6-Tetramethyl-9-phenyl-1,8-dioxooctahydroanthene (X1)<sup>1</sup>

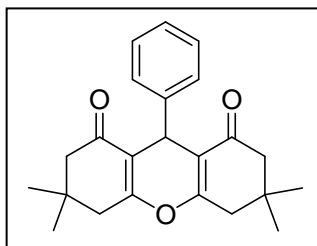

Off white solid (96 %), Melting point 199–201 °C; GC-MS ( $M^+$ ): 350;  $^1\text{H}$  NMR (400 MHz,  $\text{CDCl}_3$ )  $\delta$  (ppm) 1.01 (s, 6H), 1.12 (s, 6H), 2.29 – 2.15 (m, 4H), 2.48 (s, 4H), 4.76 (s, 1H), 7.11 (t, 1H), 7.23 (t, 2H), 7.30 (t,  $J = 6.3$  Hz, 2H);  $^{13}\text{C}$  NMR (100 MHz,  $\text{CDCl}_3$ ):  $\delta$  (ppm) 27.3, 29.26, 32.19, 40.87, 50.74, 115.66, 126.35, 128.03, 128.37, 144.08, 162.25, 196.38.

**2. 3,3,6,6-Tetramethyl-9-(2-hydroxyphenyl)-1,8-dioxooctahydroxanthene (X2)<sup>2</sup>**

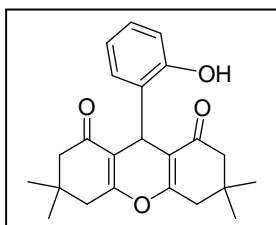

Pale yellow solid (92 %) Melting point 206–208 °C; GC-MS ( $M^+$ ): 366;  $^1\text{H}$  NMR (500 MHz,  $\text{CDCl}_3$ ):  $\delta$  (ppm) 0.98 (d, 6H), 1.01 (s, 3H), 1.11 (s, 3H), 1.96 (q, 2H), 2.27–2.58 (m, 6H), 4.68 (s, 1H), 6.98 (d, 3H), 7.11–7.15 (m, 1H), 10.44 (s, 1H);  $^{13}\text{C}$  NMR ( $\text{CDCl}_3$ , 125 MHz):  $\delta$  (ppm) 26.60, 27.11, 27.66, 29.17, 29.68, 30.97, 32.20, 41.53, 43.19, 49.96, 50.59, 111.04, 115.69, 118.28, 124.39, 124.48, 127.42, 128.00, 150.97, 168.84, 170.66, 196.50, 200.55.

**3. 3,3,6,6-Tetramethyl-9-(4-hydroxyphenyl)-1,8-dioxooctahydroxanthene (X3)<sup>1</sup>**

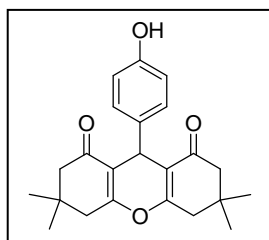

Off white solid (93 %), Melting point 252–254 °C; GC-MS ( $M^+$ ): 366;  $^1\text{H}$  NMR (500 MHz,  $\text{CDCl}_3$ ):  $\delta$  (ppm) 0.97 (s, 6H), 1.07 (s, 6H), 2.09–2.25 (m, 4H), 2.44 (s, 4H), 4.64 (s, 1H), 6.51 (d,  $J = 7.4$  Hz, 2H), 7.04 (d,  $J = 7.4$  Hz, 2H), 7.17 (s, 1H);  $^{13}\text{C}$  NMR (125 MHz,  $\text{CDCl}_3$ ):  $\delta$  (ppm) 27.4, 29.2, 30.9, 32.3, 40.8, 50.7, 115.3, 115.9, 129.3, 135.4, 154.8, 162.5, 197.4.

**4. 3,3,6,6-Tetramethyl-9-(2-Methoxyphenyl)-1,8-dioxooctahydroxanthene (X4)<sup>3</sup>**

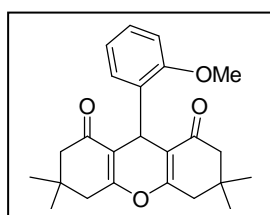

Off white solid (96 %), Melting point 230–231 °C; GC-MS ( $M^+$ ): 380,  $^1\text{H}$  NMR (400 MHz,  $\text{CDCl}_3$ )  $\delta$  (ppm) 0.96 (s, 6H), 1.11 (s, 6H), 2.12–2.25 (m, 4H), 2.37–2.50 (m, 4H), 3.79 (s, 3H), 4.87 (s, 1H), 6.77 (d,  $J = 8.1$  Hz, 1H), 6.88 (d, 1H), 7.12 (t, 1H), 7.43 – 7.44 (d, 1H);  $^{13}\text{C}$

NMR (100 MHz, CDCl<sub>3</sub>)  $\delta$  (ppm) 26.76, 29.49, 32.11, 40.97, 50.79, 55.14, 110.65, 113.76, 120.36, 127.75, 132.07, 157.59, 162.86, 196.54.

**5. 3,3,6,6-Tetramethyl-9-(4-Methoxyphenyl)-1,8-dioxooctahydroxanthene (X5)<sup>1</sup>**

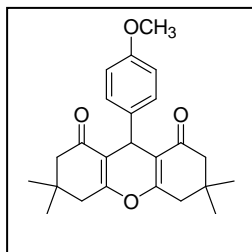

White solid (88 %), Melting point 243–245 °C; GC-MS (M<sup>+</sup>): 380, <sup>1</sup>H NMR (400 MHz, CDCl<sub>3</sub>):  $\delta$  (ppm) 1.01 (s, 6H), 1.12 (s, 6H), 2.18 (d, *J* = 16.4 Hz, 2H), 2.25 (d, *J* = 16.4 Hz, 2H), 2.48 (s, 4H), 3.75 (s, 3H), 4.72 (s, 1H), 6.77 (d, *J* = 8.8 Hz, 2H), 7.22 (d, *J* = 8.8 Hz, 2H); <sup>13</sup>C NMR (100 MHz, CDCl<sub>3</sub>):  $\delta$  (ppm) 27.3, 29.3, 30.9, 32.2, 40.9, 50.8, 55.1, 113.5, 115.8, 129.3, 136.5, 157.9, 162.1, 196.5.

**6. 3,3,6,6-Tetramethyl-9-(4-chlorophenyl)-1,8-dioxooctahydroxanthene (X6)<sup>1</sup>**

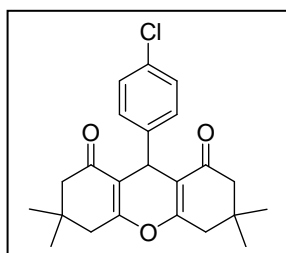

White solid (88 %), Melting point 229–231 °C; GC-MS (M<sup>+</sup>): 384, <sup>1</sup>H NMR (500 MHz, DMSO-*d*<sub>6</sub>):  $\delta$  (ppm) 0.90 (s, 6H), 1.04 (s, 6H), 2.09 (d, *J* = 16.1 Hz, 2H), 2.27 (d, 2H), 2.52 (d, 2H), 2.57 (d, 2H), 4.51 (s, 1H), 7.19 (d, 2H), 7.29 (d, 2H); <sup>13</sup>C NMR (125 MHz, CDCl<sub>3</sub>):  $\delta$  (ppm) 27.3, 29.3, 31.5, 32.2, 40.8, 50.7, 115.2, 128.2, 129.8.2, 131.9, 142.8, 162.5, 196.4.

**7. 3,3,6,6-Tetramethyl-9-(4-bromophenyl)-1,8-dioxooctahydroxanthene (X7)<sup>1</sup>**

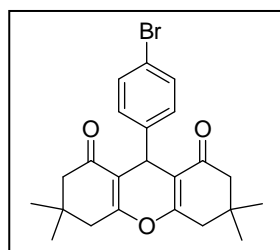

White solid (88 %), Melting point 242–244 °C; GC-MS (M<sup>+</sup>): 429, <sup>1</sup>H NMR (400 MHz, CDCl<sub>3</sub>)  $\delta$  0.88 (s, 6H), 0.99 (s, 6H), 2.09 (q, *J* = 16.3 Hz, 4H), 2.35 (s, 4H), 4.58 (s, 1H), 7.07

(d,  $J = 8.4$  Hz, 2H), 7.23 (d,  $J = 8.4$  Hz, 2H);  $^{13}\text{C}$  NMR (100 MHz,  $\text{CDCl}_3$ )  $\delta$  27.48, 29.47, 32.40, 41.03, 50.87, 115.37, 120.43, 130.37, 131.35, 143.41, 162.68, 196.59.

**8. 3,3,6,6-Tetramethyl-9-(4-nitrophenyl)-1,8-dioxooctahydroxanthene (X8)<sup>1</sup>**

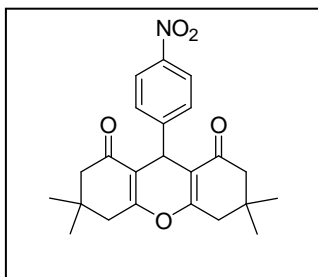

Yellow solid (90 %), Melting point 224–226 °C; GC-MS ( $M^+$ ): 395,  $^1\text{H}$  NMR (500 MHz,  $\text{CDCl}_3$ ):  $\delta$  (ppm) 0.99 (s, 6H), 1.12 (s, 6H), 2.16 (d, 2H), 2.26 (d, 2H), 2.51 (t, 4H), 4.83 (s, 1H), 7.48 (d, 2H), 8.08 (2H, 2H);  $^{13}\text{C}$  NMR (125 MHz,  $\text{CDCl}_3$ ):  $\delta$  (ppm) 27.7, 29.6, 32.6, 32.8, 41.2, 51.0, 114.9, 123.8, 129.8, 146.8, 152.0, 163.5, 196.7.

**9. 3,3,6,6-Tetramethyl-9-(2-Thienyl)-1,8-dioxooctahydroxanthene (X10)<sup>4</sup>**

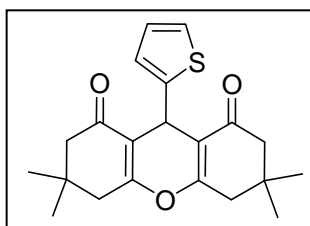

Black solid (90); Melting point 161-162 °C; GC-MS ( $M^+$ ): 356,  $^1\text{H}$  NMR (400 MHz,  $\text{CDCl}_3$ )  $\delta$  1.02 (s, 6H), 1.08 (s, 6H), 2.23 (s, 4H), 2.43 (s, 4H), 5.11 (s, 1H), 6.80 (m, 1H), 6.93 (d, 1H), 6.99 (d, 1H),  $^{13}\text{C}$  NMR (100 MHz,  $\text{CDCl}_3$ )  $\delta$  26.55, 27.54, 29.53, 32.32, 41.04, 50.93, 115.45, 123.57, 125.49, 126.93, 148.33, 162.91, 196.50.

**10. 3,3,6,6-Tetramethyl-9-(2-phenylethyl)-1,8-dioxooctahydroxanthene (X11)<sup>5</sup>**

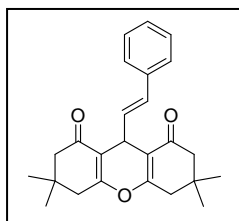

Pale yellow solid (88 %); Melting point 175– 177 °C; GC-MS ( $M^+$ ): 376,  $^1\text{H}$  NMR (400 MHz,  $\text{CDCl}_3$ )  $\delta$  (ppm) 1.12 (s, 12H), 2.30 (d, 4H), 2.44 (d, 4H), 4.41 (s, 1H), 6.24-6.32 (m, 2H), 7.15 – 7.28 (m, 5H),  $^{13}\text{C}$  NMR (100 MHz,  $\text{CDCl}_3$ )  $\delta$  (ppm) 27.59, 29.24, 32.21, 40.94, 50.84, 114.51, 126.35, 127.11, 128.29, 130.44, 131.31, 137.25, 163.11, 196.62.

Abundance

TIC: ZREG.D\data.ms

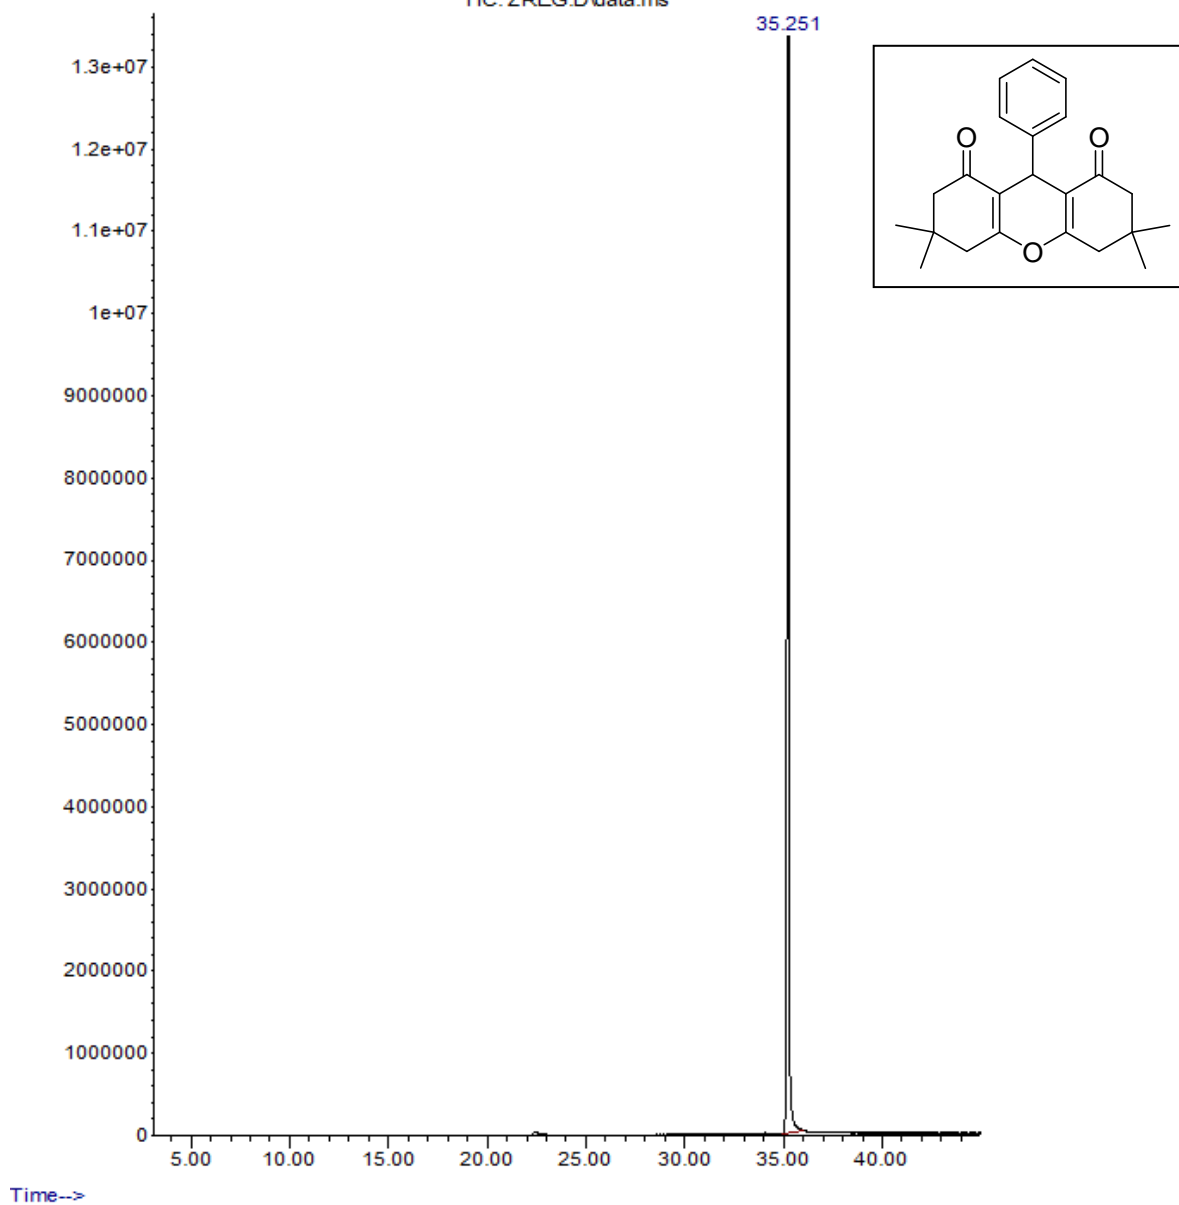

Gas chromatogram of 3,3,6,6-Tetramethyl-9-phenyl-1,8-dioxooctahydroanthene (X1)

Abundance

Scan 5622 (35.250 min): ZREG.D\data.ms

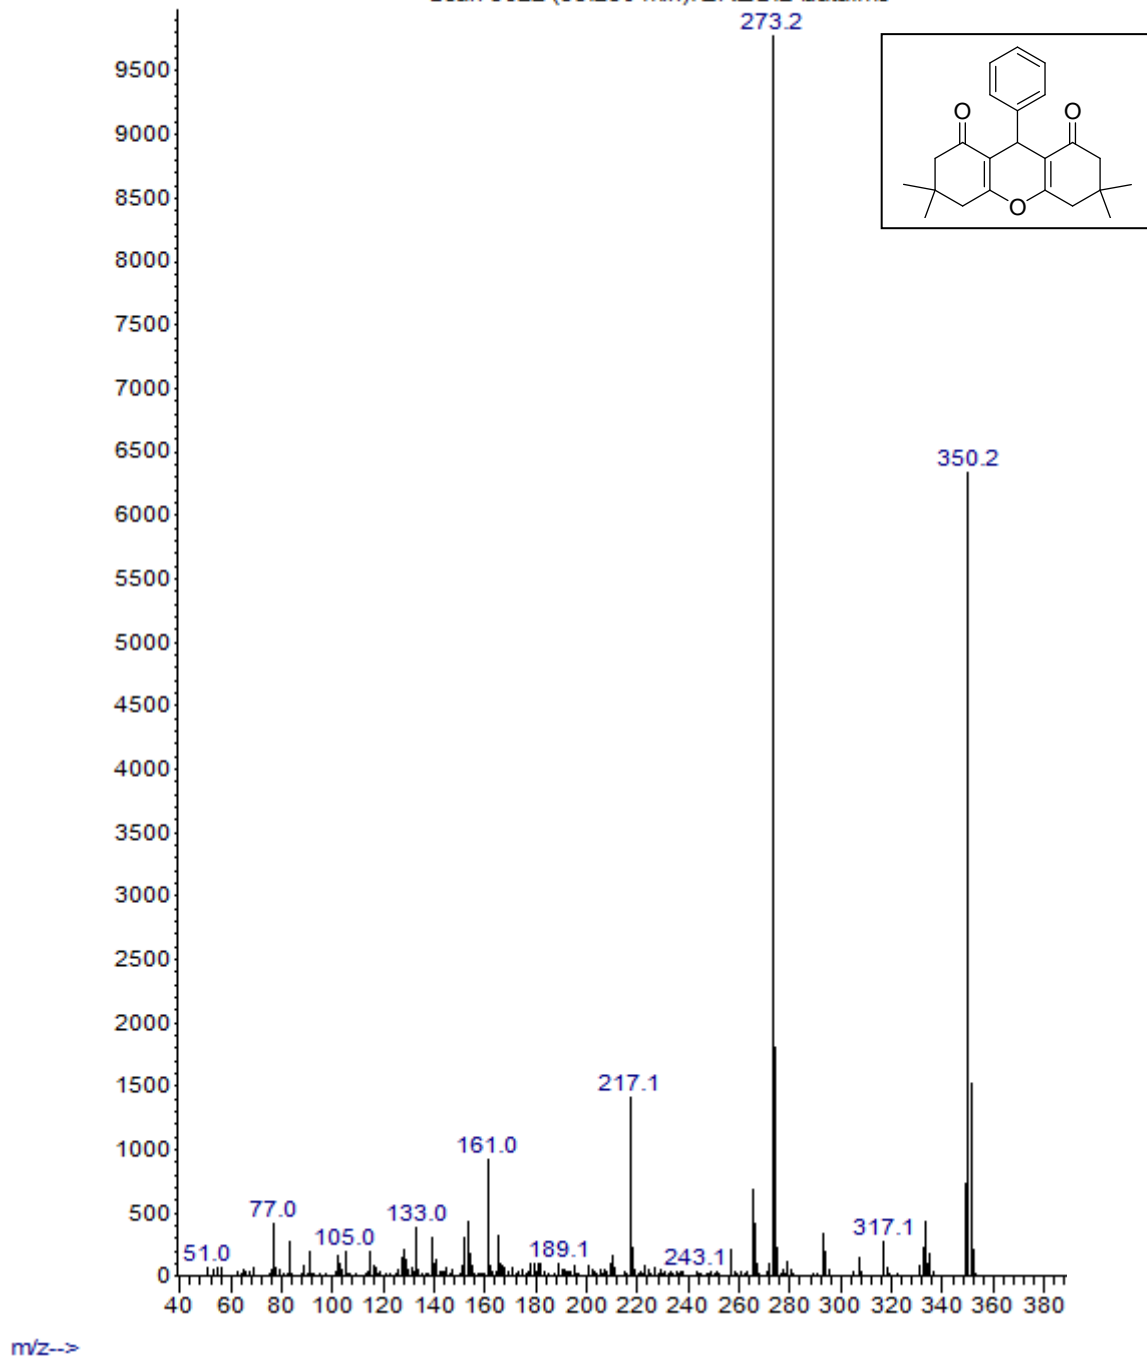

Mass spectrum of 3,3,6,6-Tetramethyl-9-phenyl-1,8-dioxooctahydroanthene (X1)

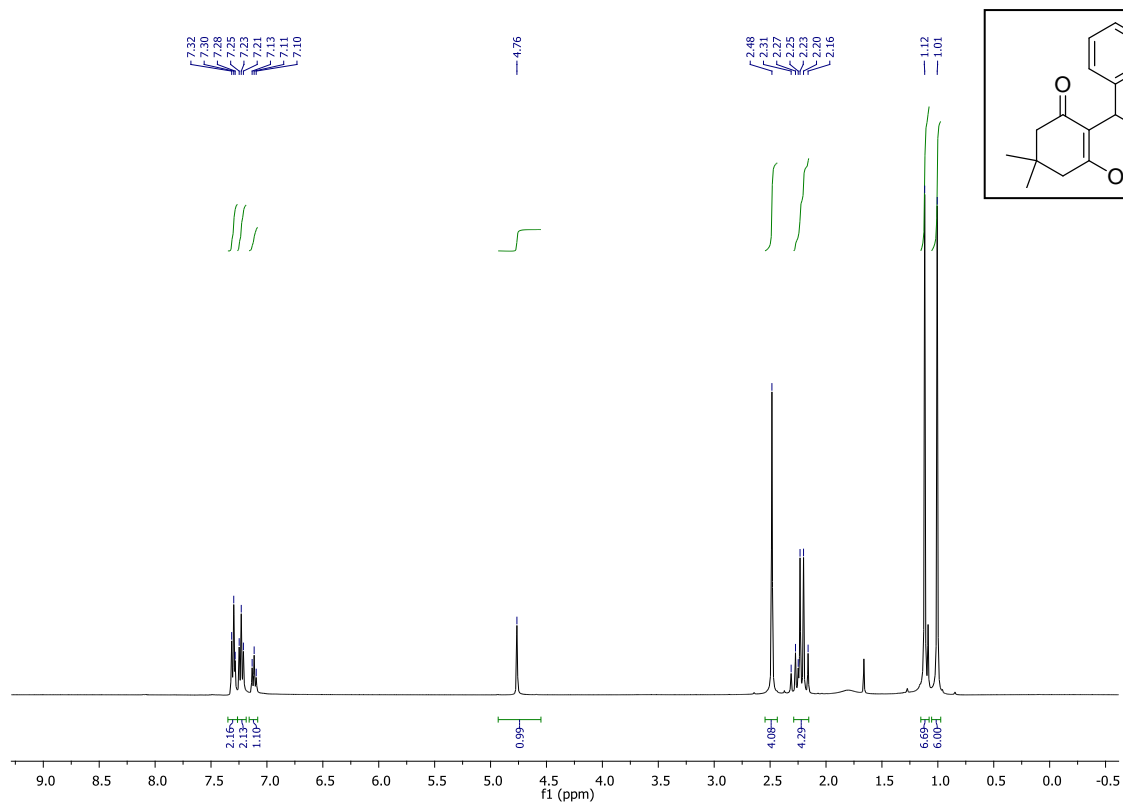

<sup>1</sup>H NMR spectrum of 3,3,6,6-Tetramethyl-9-phenyl-1,8-dioxooctahydroxanthene (X1)

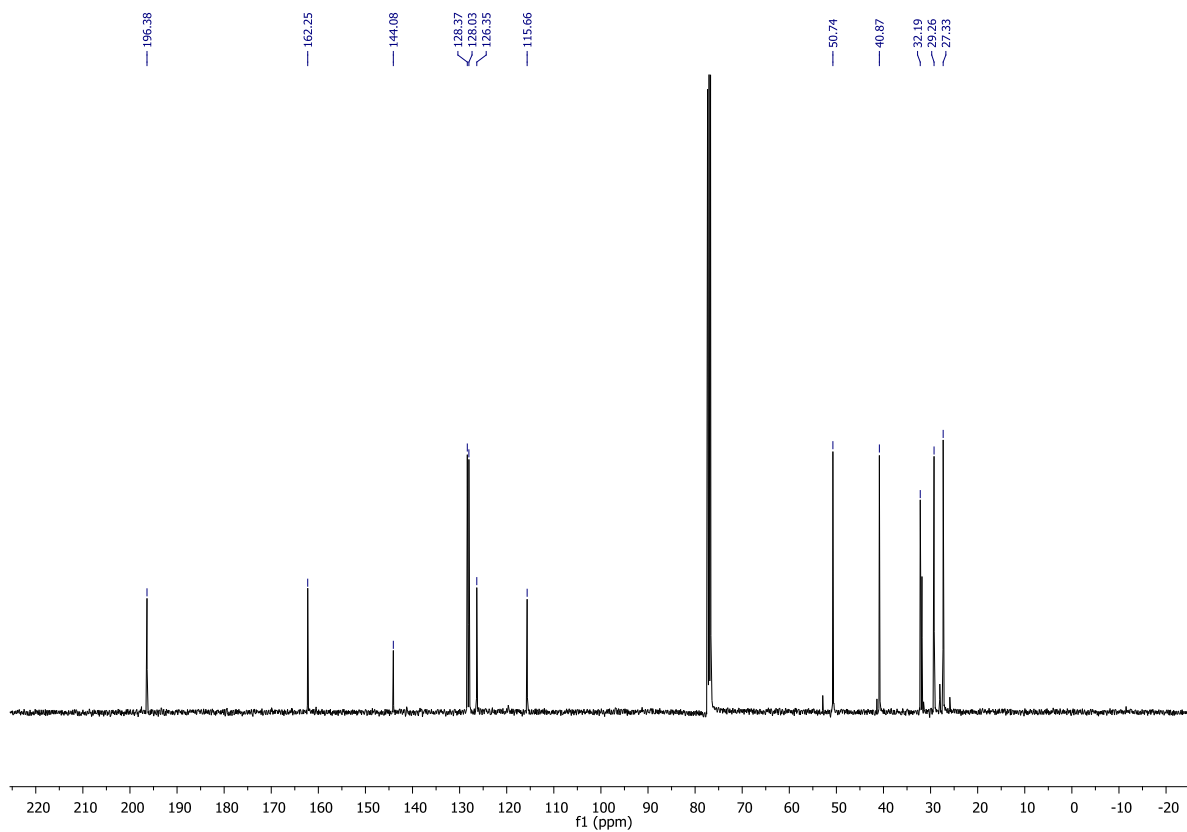

<sup>13</sup>C NMR spectrum of 3,3,6,6-Tetramethyl-9-phenyl-1,8-dioxooctahydroxanthene (X1)



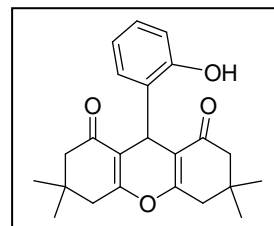

Abundance

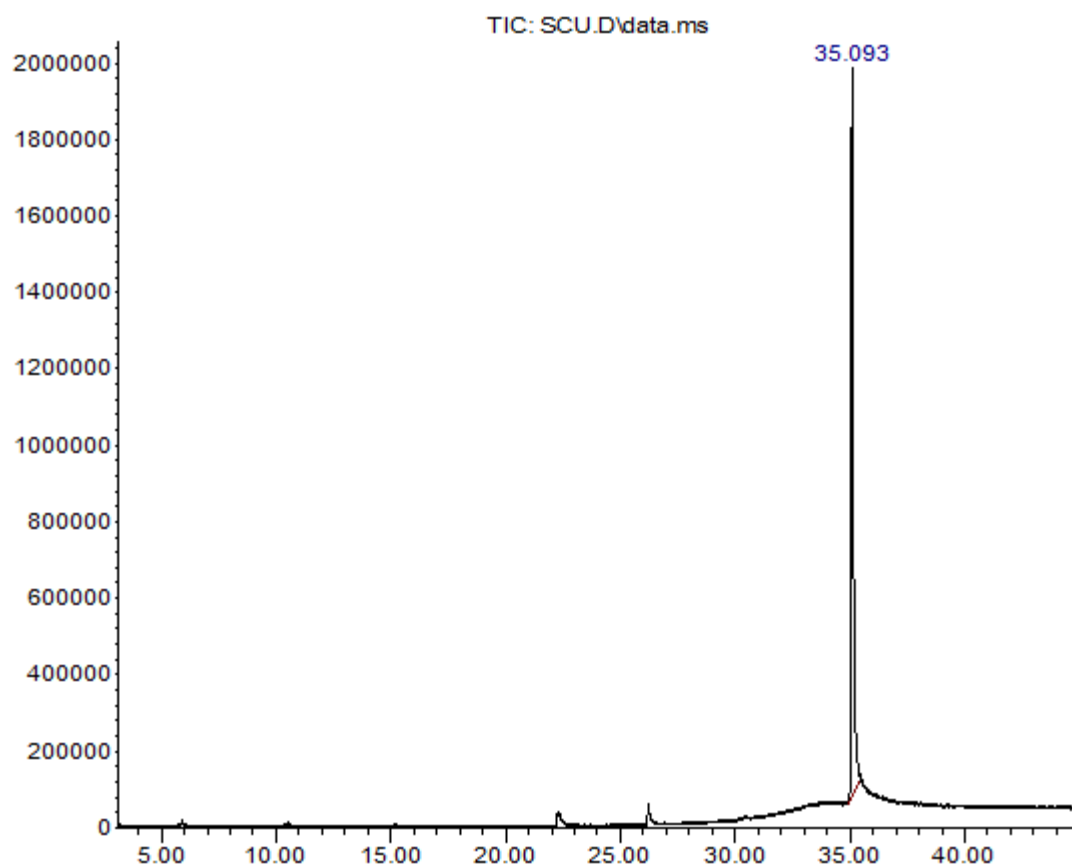

Time-->

Gas chromatogram of 3,3,6,6-Tetramethyl-9-(2-hydroxyphenyl)-1,8 dioxooctahydroanthene (X2)

Abundance

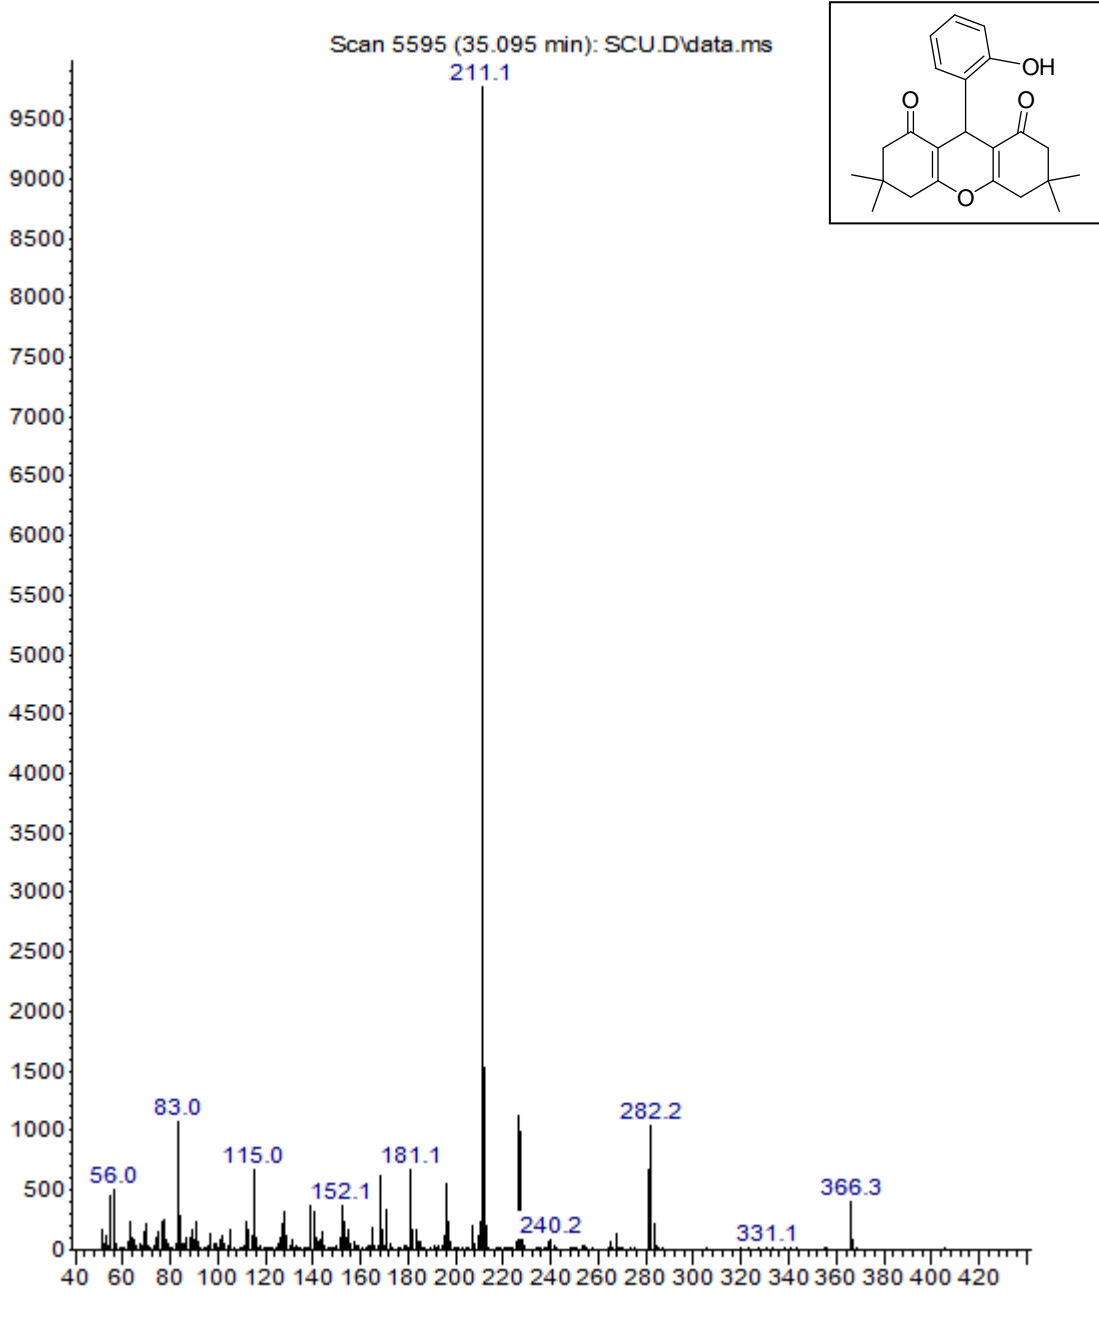

Mass spectrum of 3,3,6,6-Tetramethyl-9-(2-hydroxyphenyl)-1,8 dioxooctahydroanthene (X2)

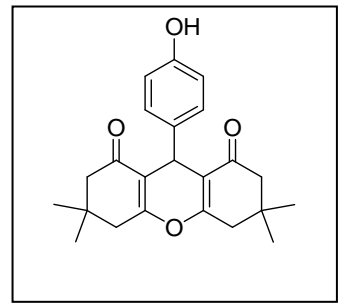

Abundance

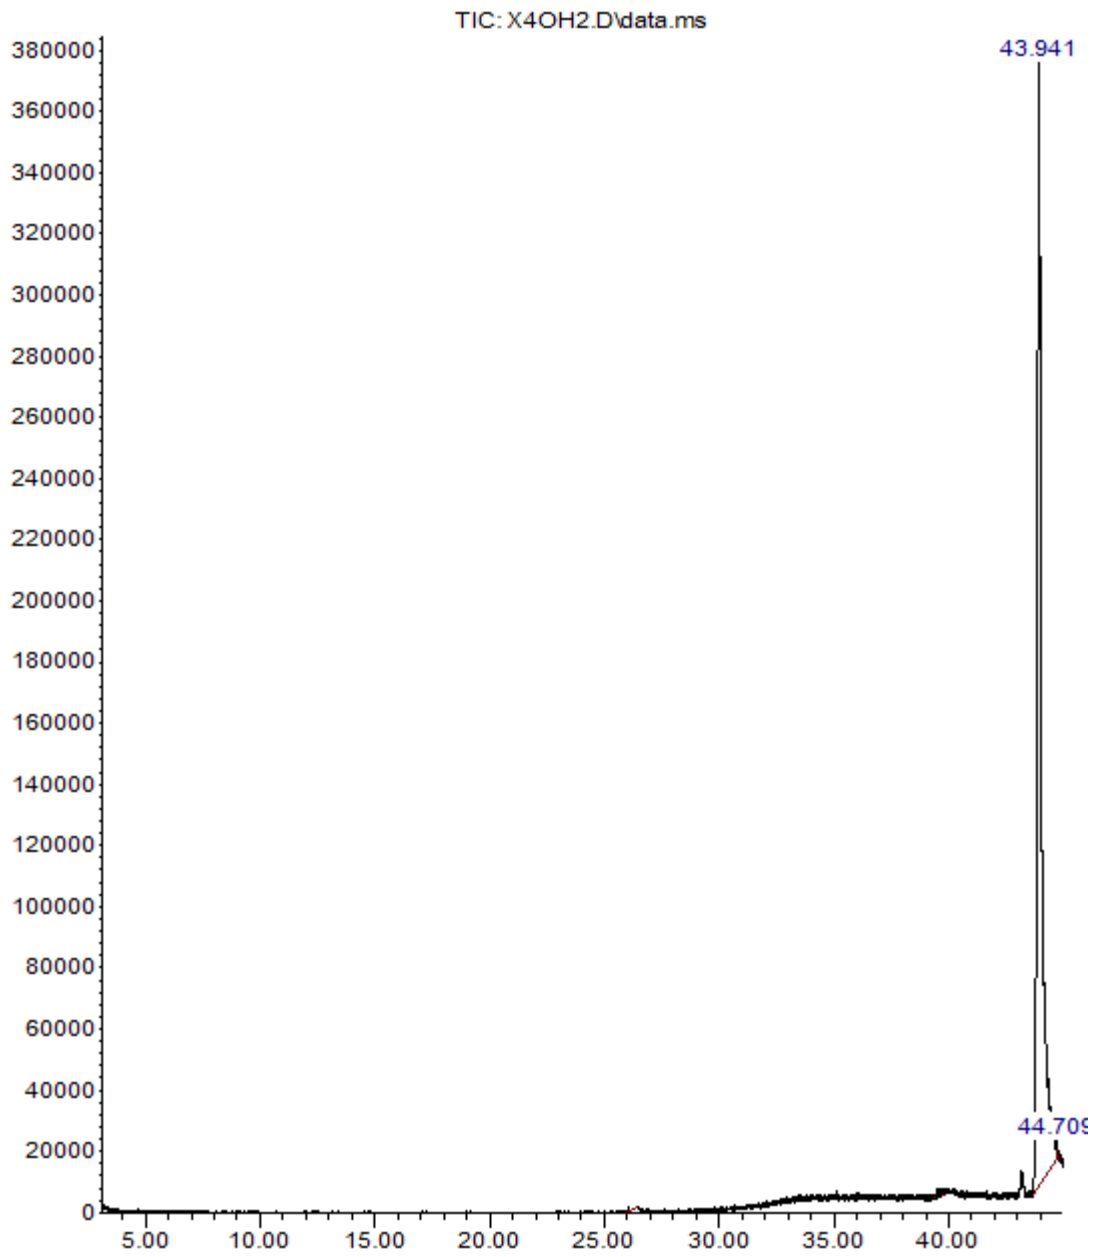

Gas chromatogram of 3,3,6,6-Tetramethyl-9-(4-hydroxyphenyl)-1,8-dioxooctahydroanthene (X3)

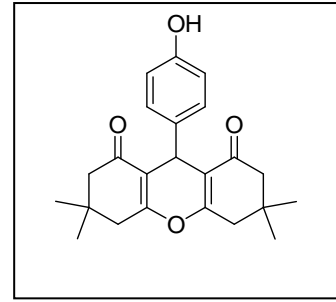

Abundance

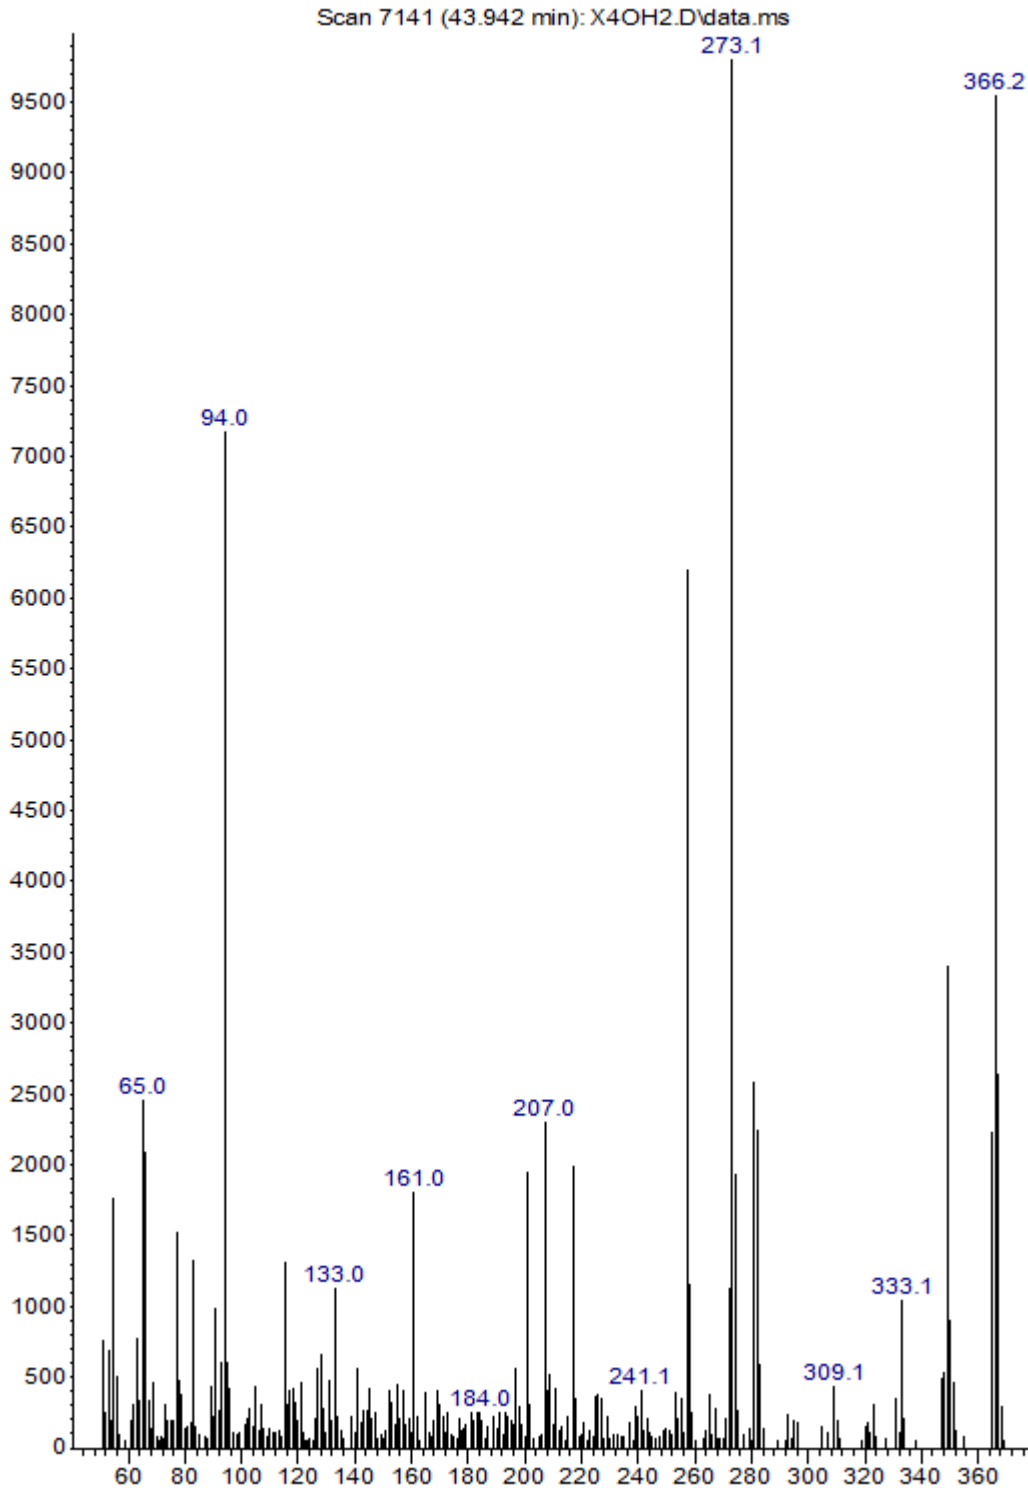

m/z-->

Mass spectrum of 3,3,6,6-Tetramethyl-9-(4-hydroxyphenyl)-1,8-dioxooctahydroanthene (X3)

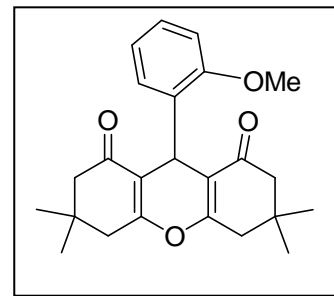

Abundance

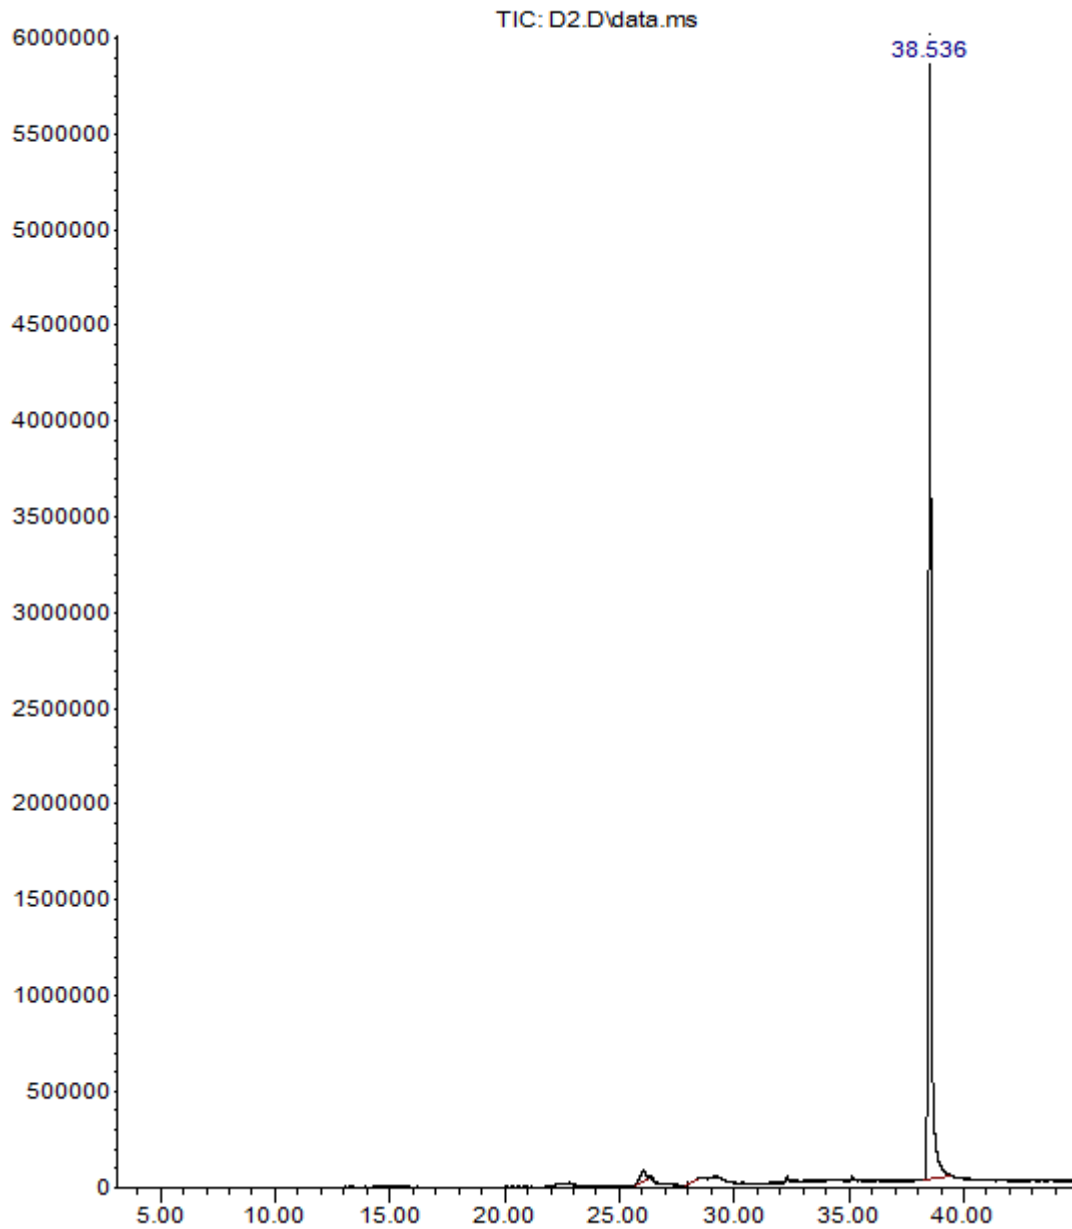

Time-->

Gas chromatogram of 3,3,6,6-Tetramethyl-9-(2-Methoxyphenyl)-1,8-dioxooctahydroanthene (X4)

Abundance

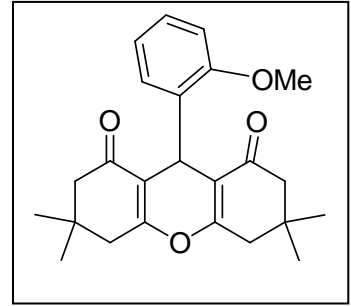

Scan 6196 (38.534 min): D2.D\data.ms

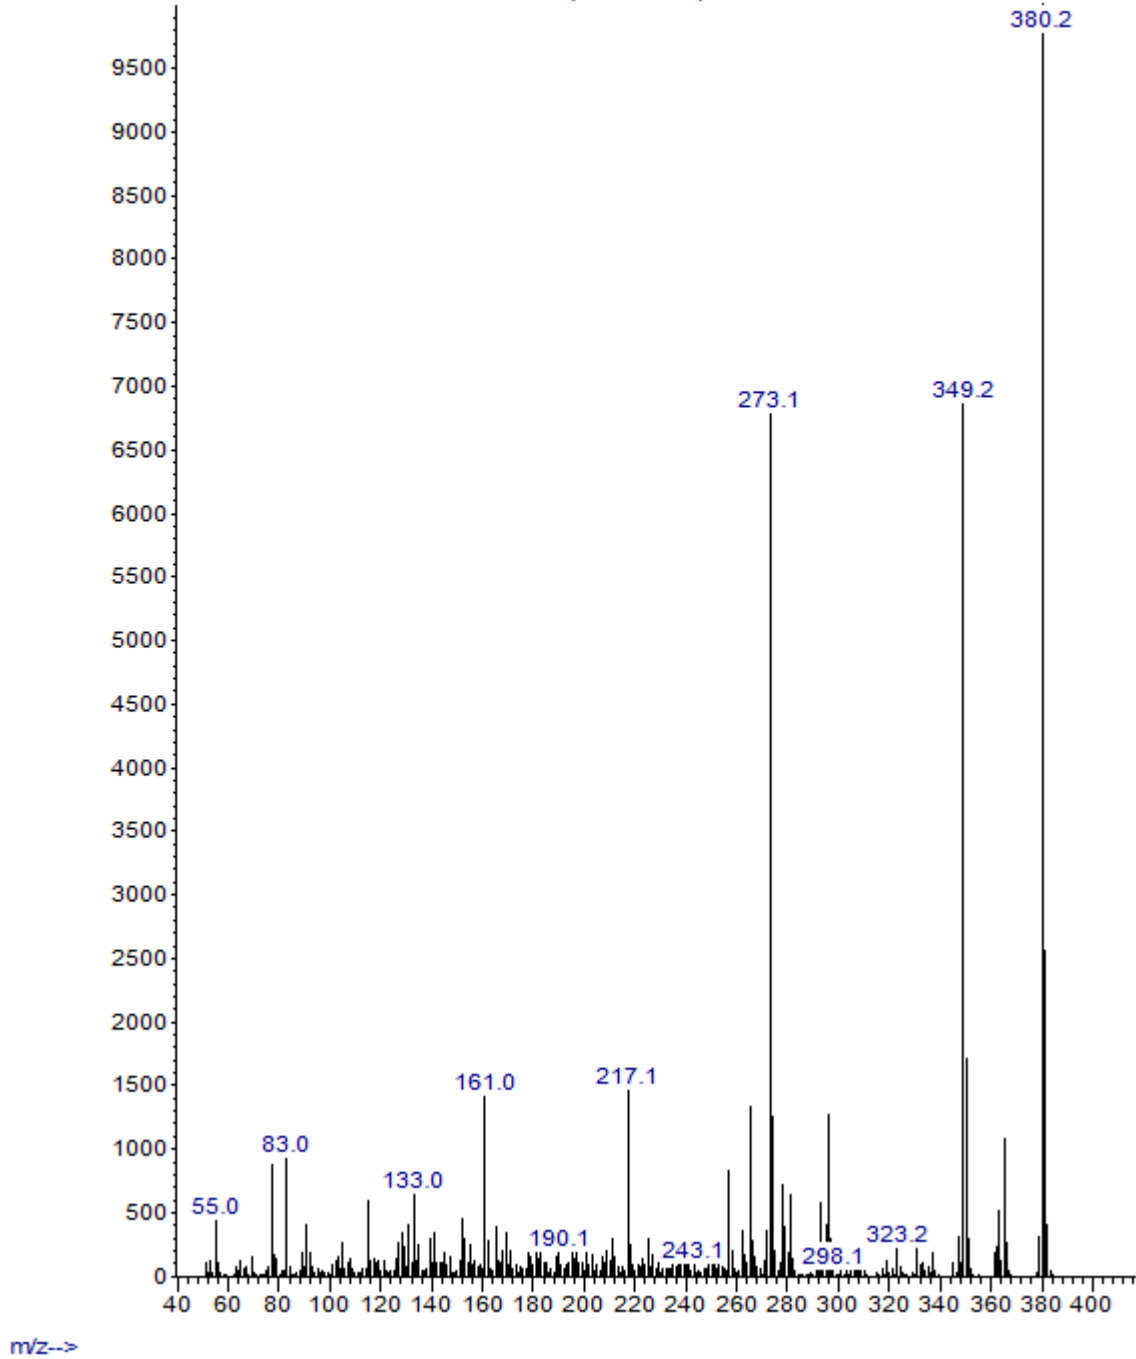

Mass spectrum of 3,3,6,6-Tetramethyl-9-(2-Methoxyphenyl)-1,8-dioxooctahydroxanthene (X4)

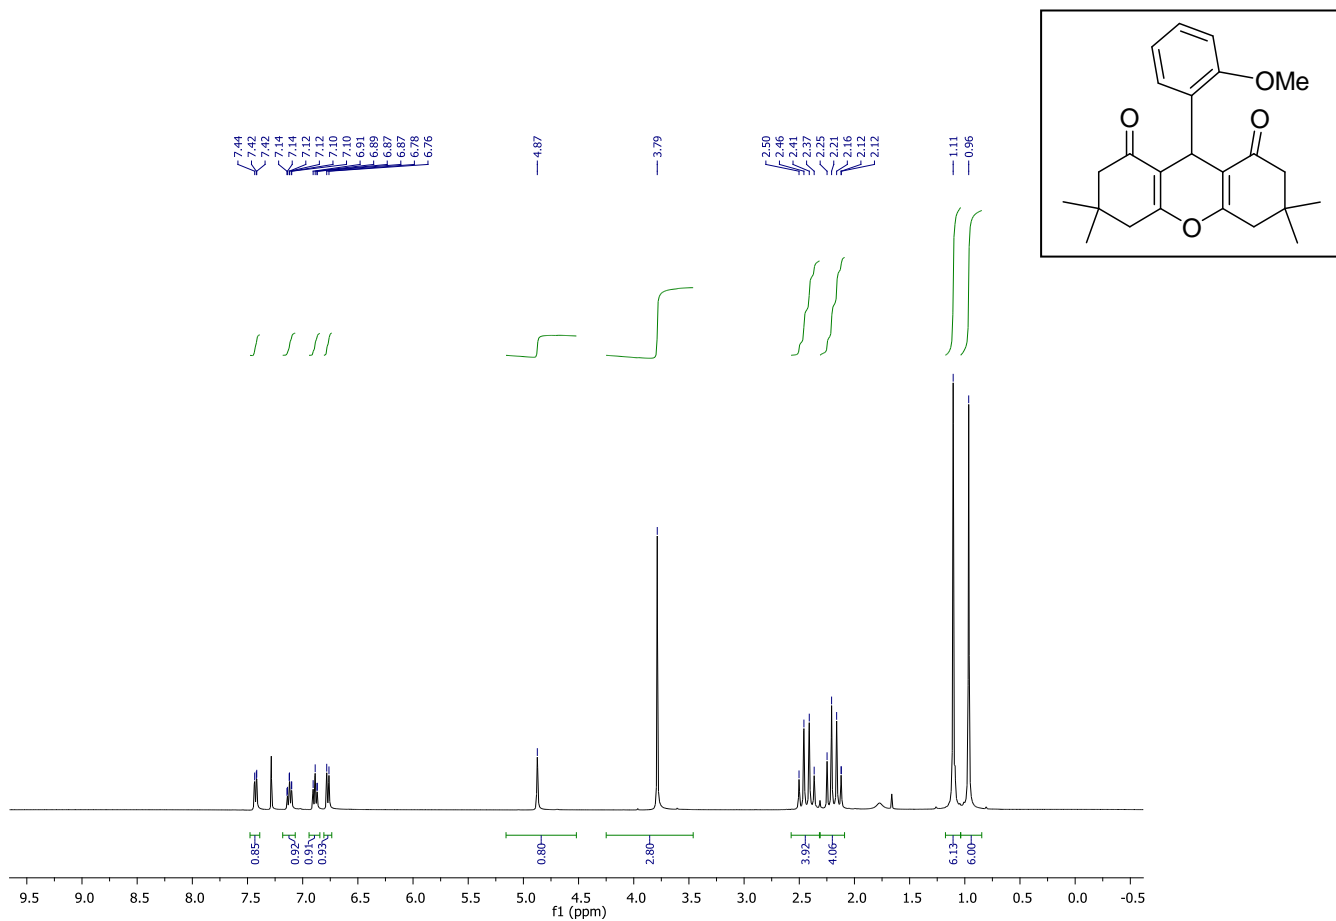

<sup>1</sup>H NMR spectrum of 3,3,6,6-Tetramethyl-9-(2-Methoxyphenyl)-1,8-dioxooctahydroxanthene (X4)

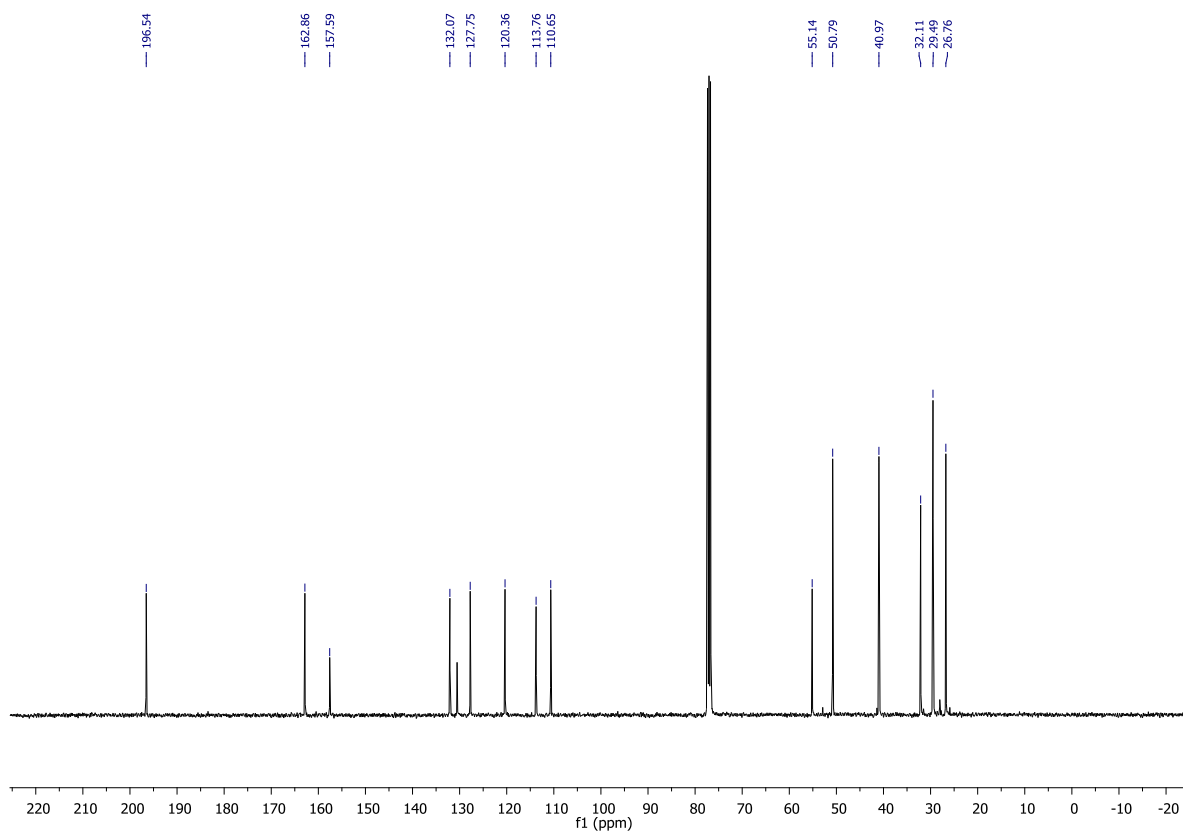

<sup>13</sup>C NMR spectrum of 3,3,6,6-Tetramethyl-9-(2-Methoxyphenyl)-1,8-dioxooctahydroxanthene (X4)

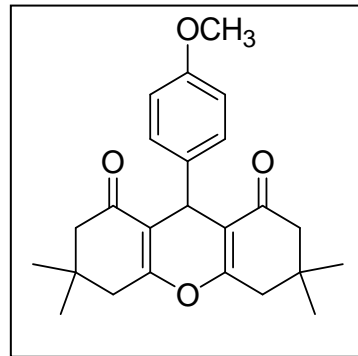

Abundance

TIC: X4R.D\data.ms

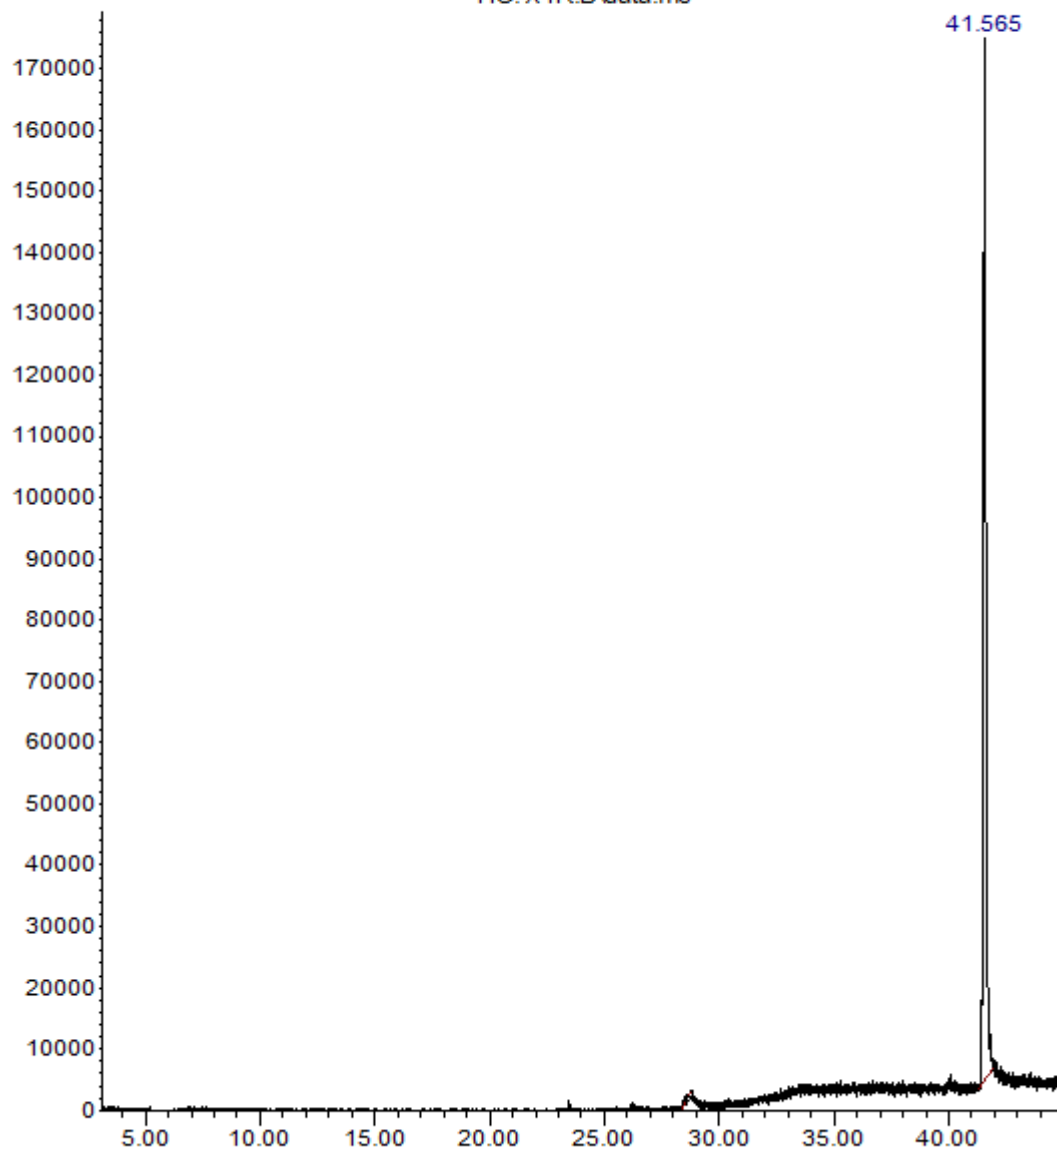

Time-->

Gas chromatogram of 3,3,6,6-Tetramethyl-9-(4-Methoxyphenyl)-1,8-dioxooctahydroanthene (X5)



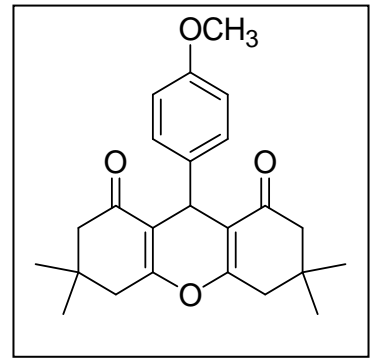

Abundance

Scan 6726 (41.567 min): X4R.D\data.ms

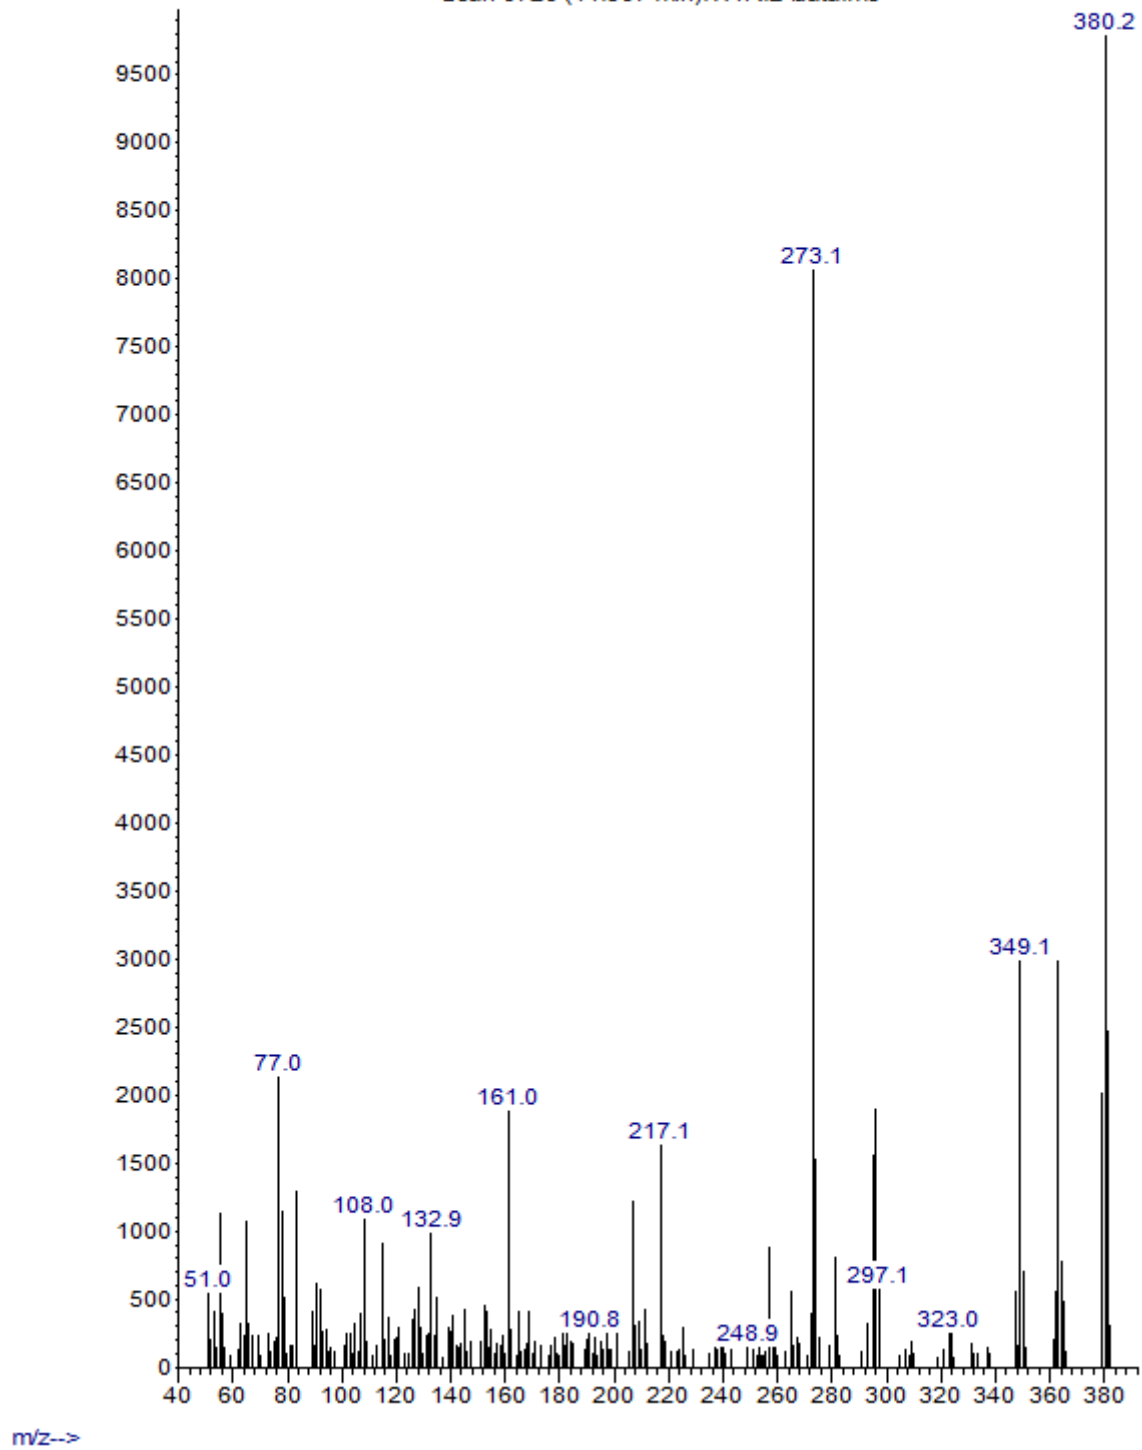

Mass spectrum of 3,3,6,6-Tetramethyl-9-(4-Methoxyphenyl)-1,8-dioxooctahydroxanthene (X5)

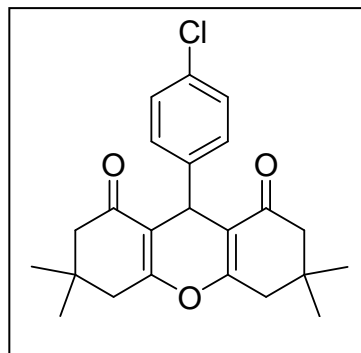

Abundance

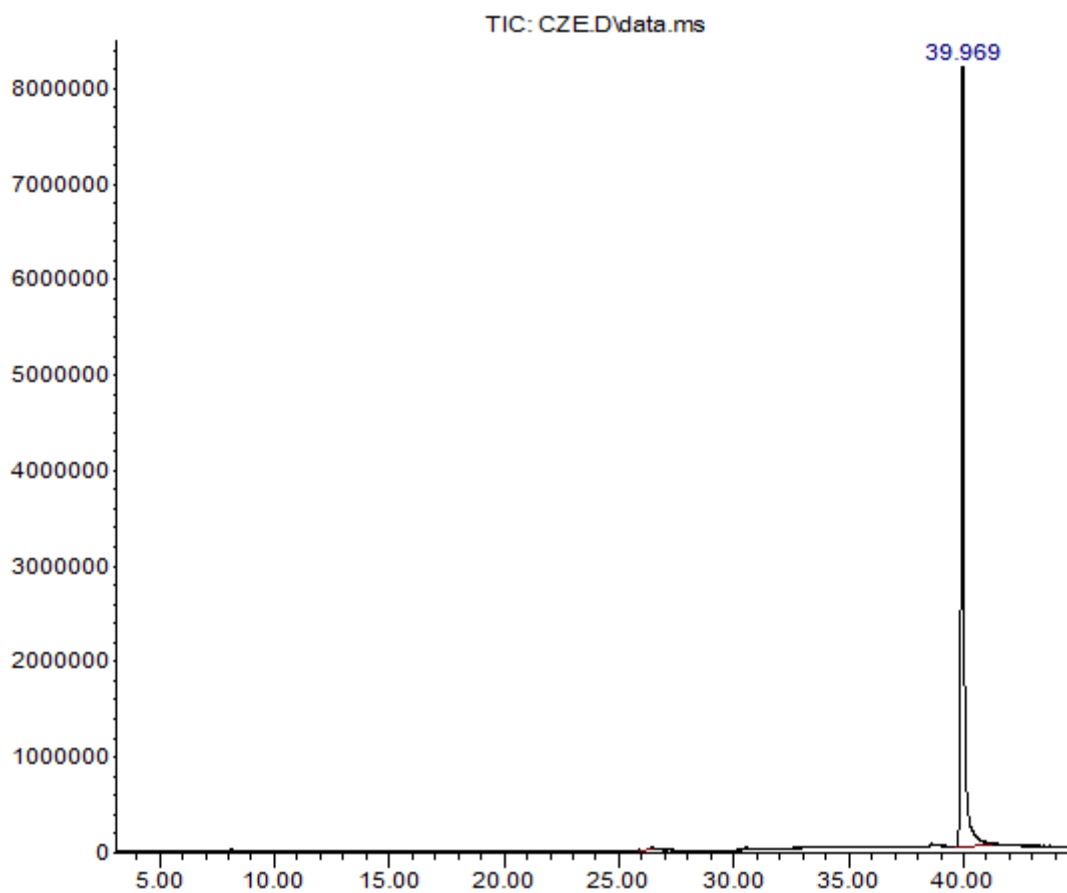

Time-->

Gas chromatogram of 3,3,6,6-Tetramethyl-9-(4-chlorophenyl)-1,8-dioxooctahydroanthene (X6)

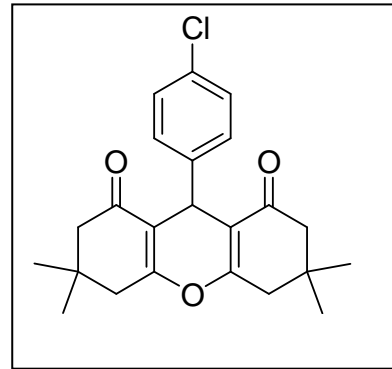

Abundance

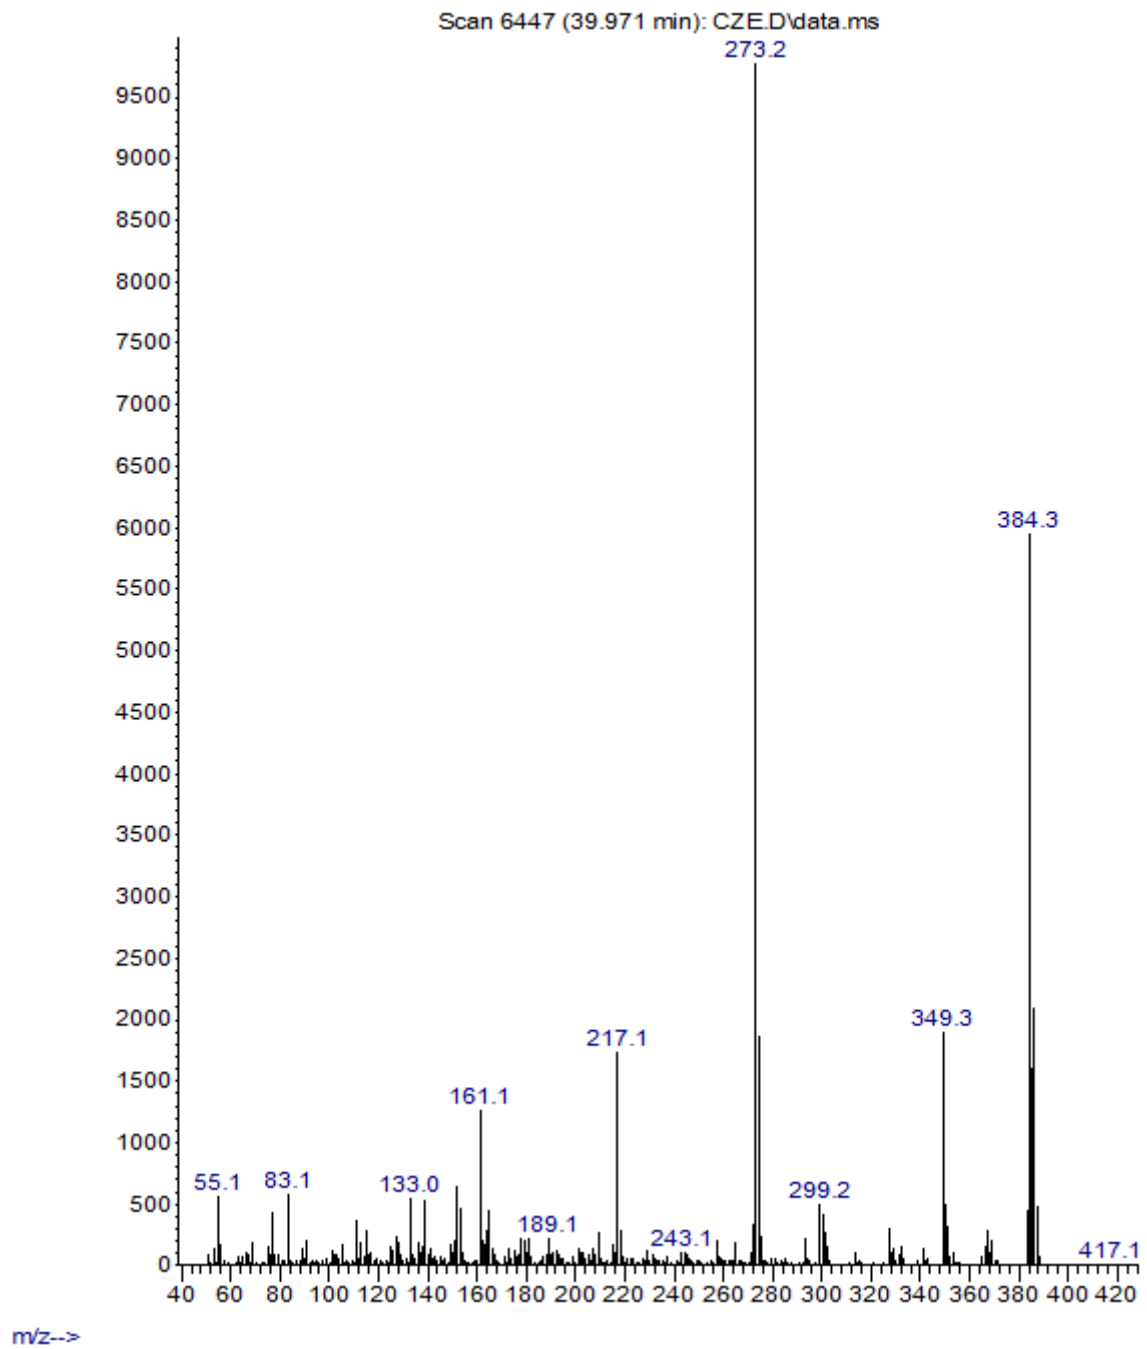

Mass spectrum of 3,3,6,6-Tetramethyl-9-(4-chlorophenyl)-1,8-dioxooctahydroanthene (X6)

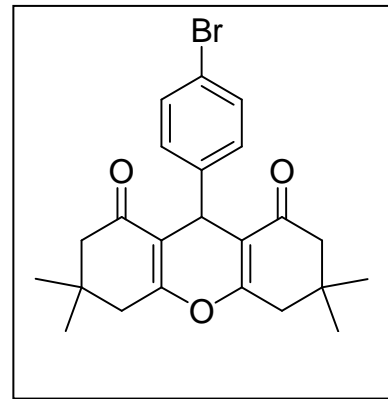

Abundance

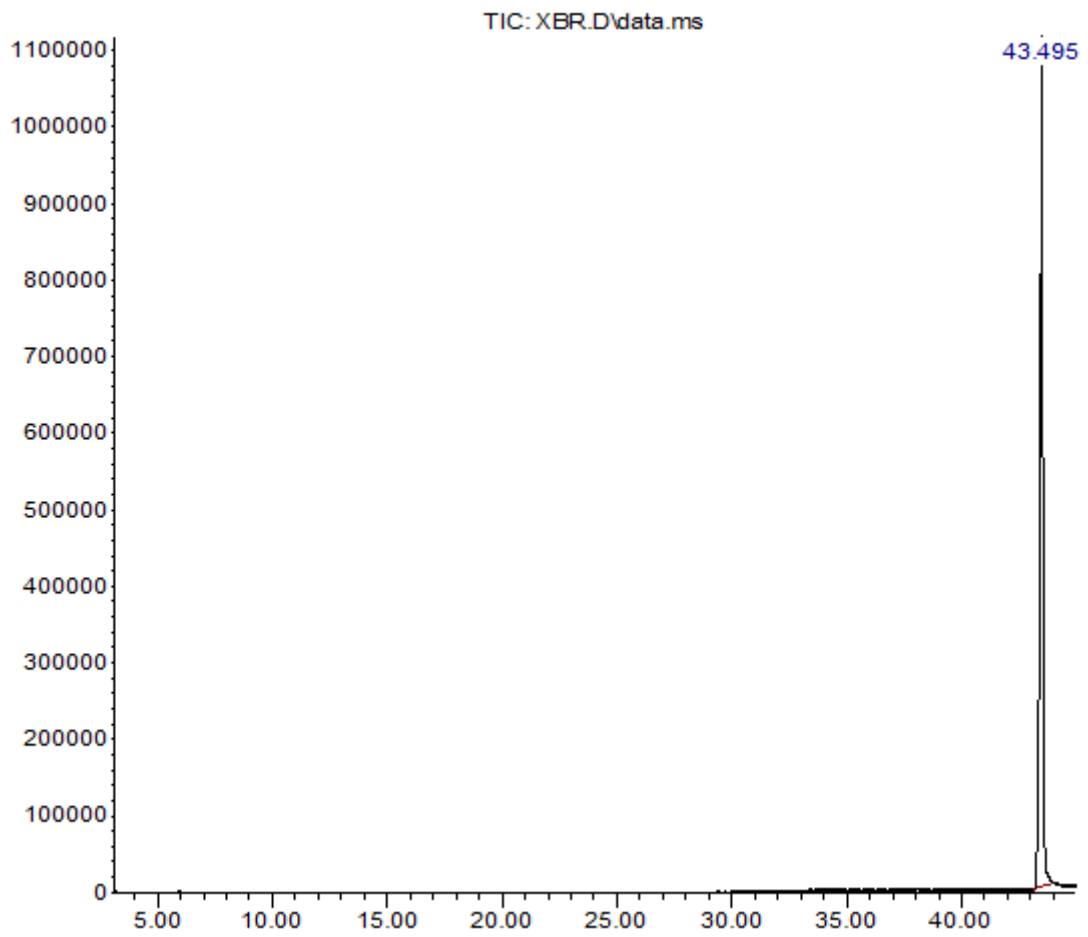

Time-->

Gas chromatogram of 3,3,6,6-Tetramethyl-9-(4-bromophenyl)-1,8-dioxooctahydroanthene (X7)

Abundance

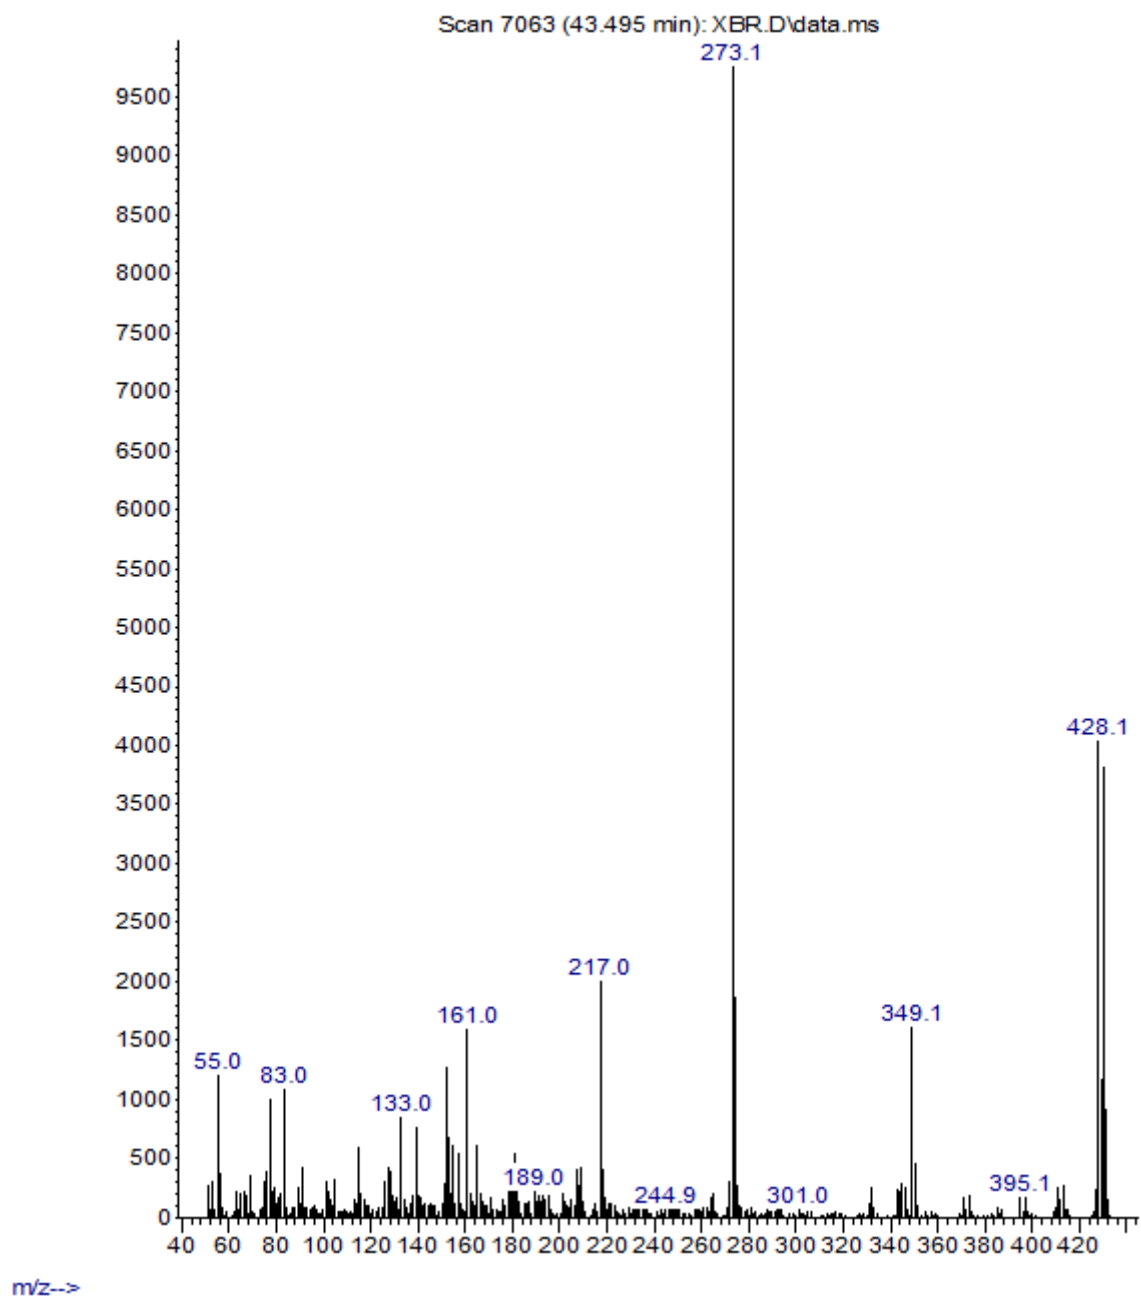

Mass spectrum of 3,3,6,6-Tetramethyl-9-(4-bromophenyl)-1,8-dioxooctahydroxanthene (X7)

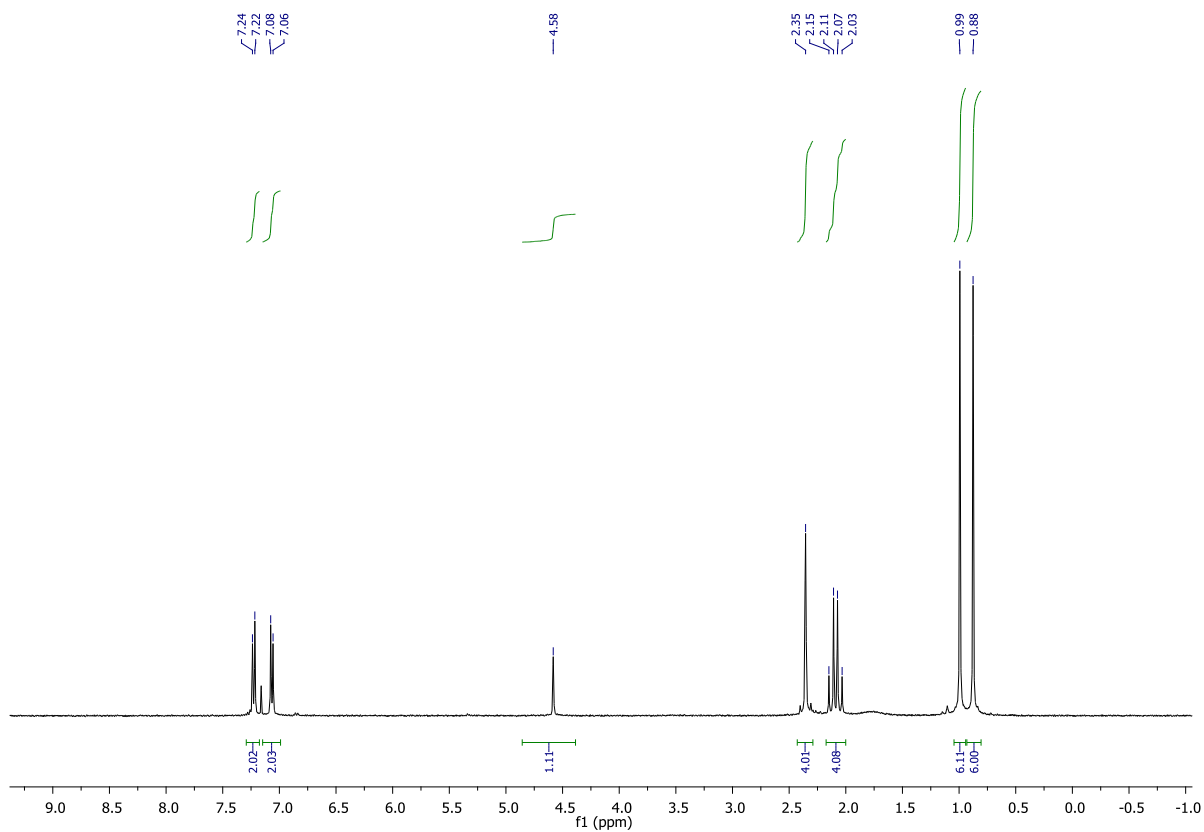

<sup>1</sup>H NMR spectrum of 3,3,6,6-Tetramethyl-9-(4-bromophenyl)-1,8-dioxooctahydroxanthene (X7)

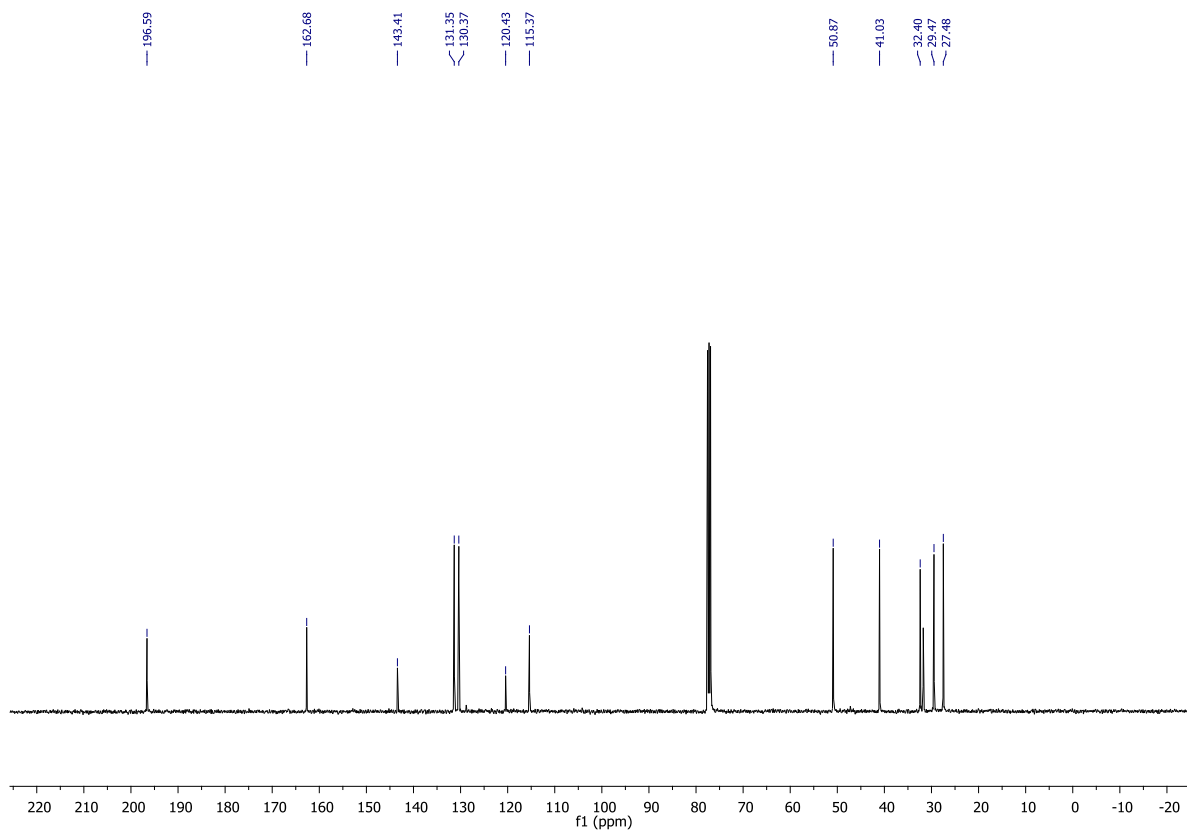

<sup>13</sup>C NMR spectrum of 3,3,6,6-Tetramethyl-9-(4-bromophenyl)-1,8-dioxooctahydroxanthene (X7)

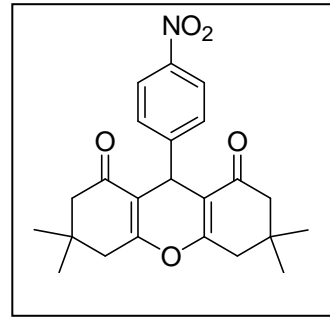

Abundance

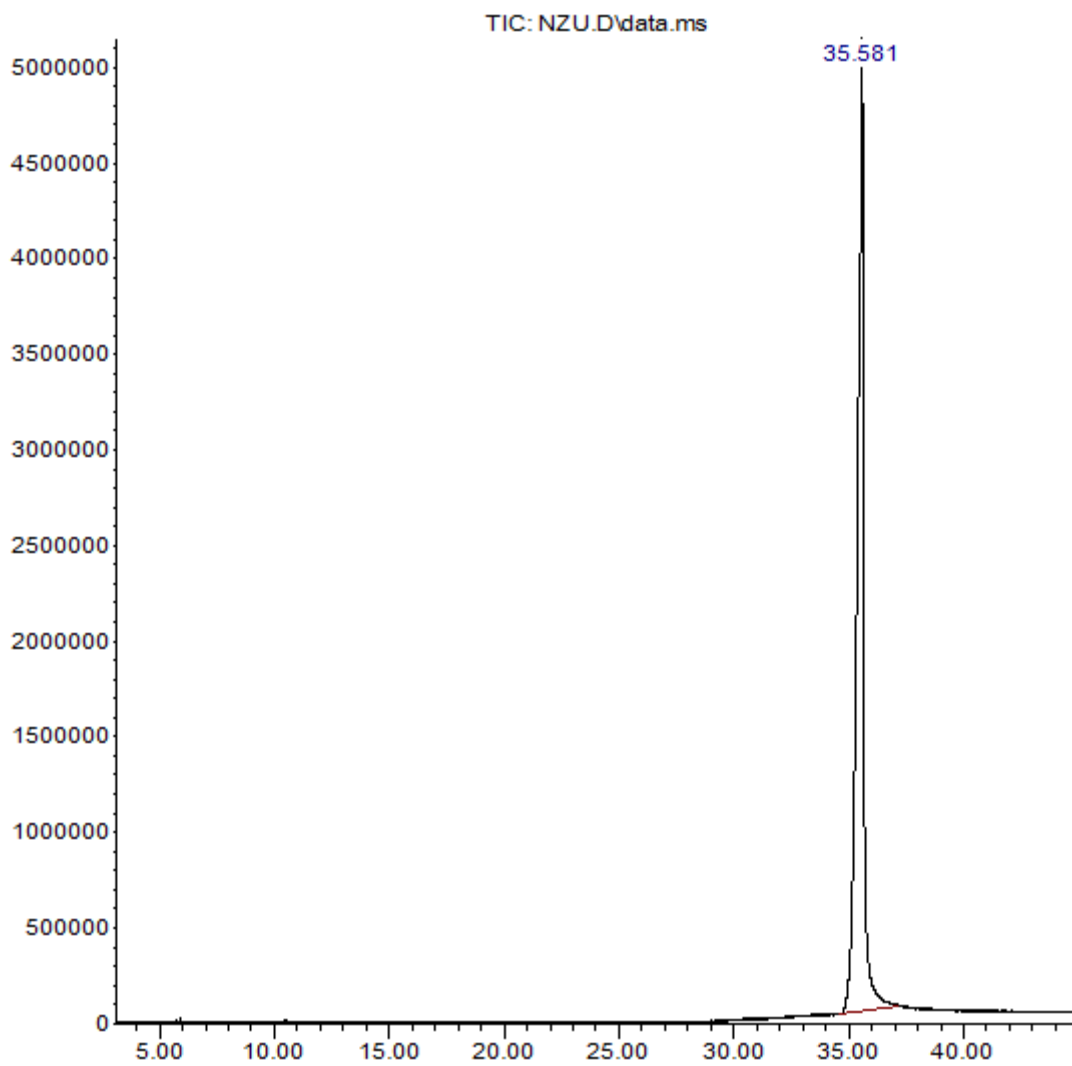

Time-->

Gas chromatogram of 3,3,6,6-Tetramethyl-9-(4-nitrophenyl)-1,8-dioxooctahydroanthene (X8)

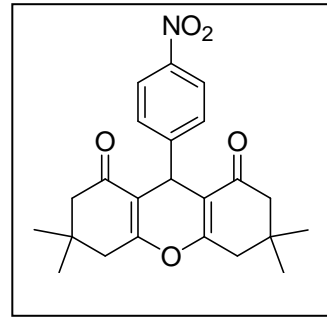

Abundance

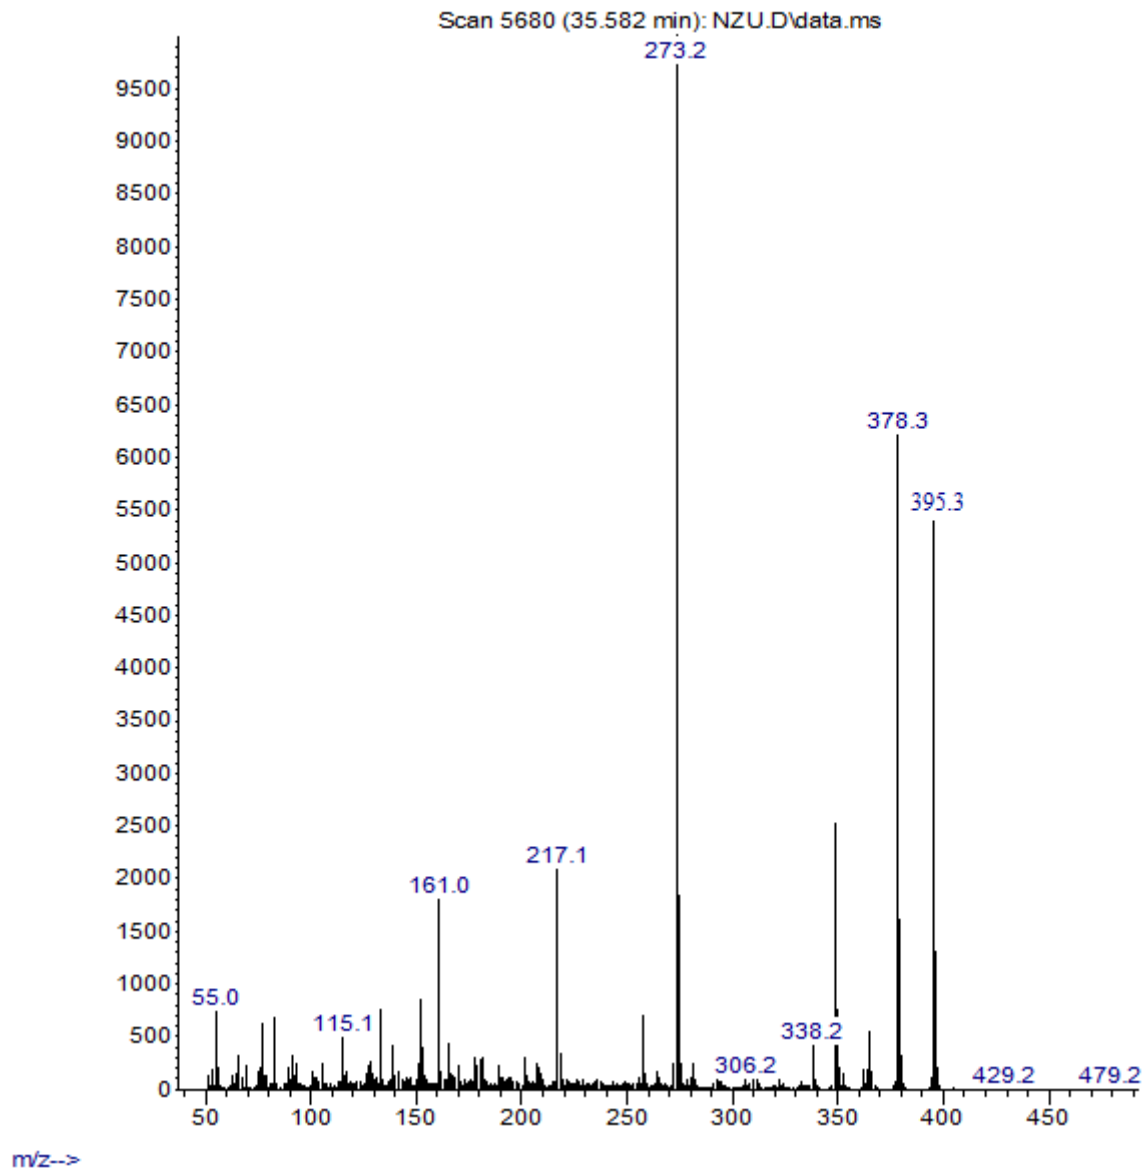

Mass spectrum of 3,3,6,6-Tetramethyl-9-(4-nitrophenyl)-1,8-dioxooctahydroanthene (X8)



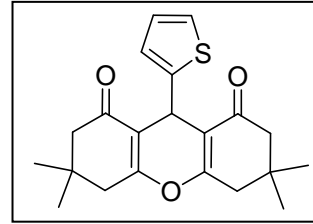

Abundance

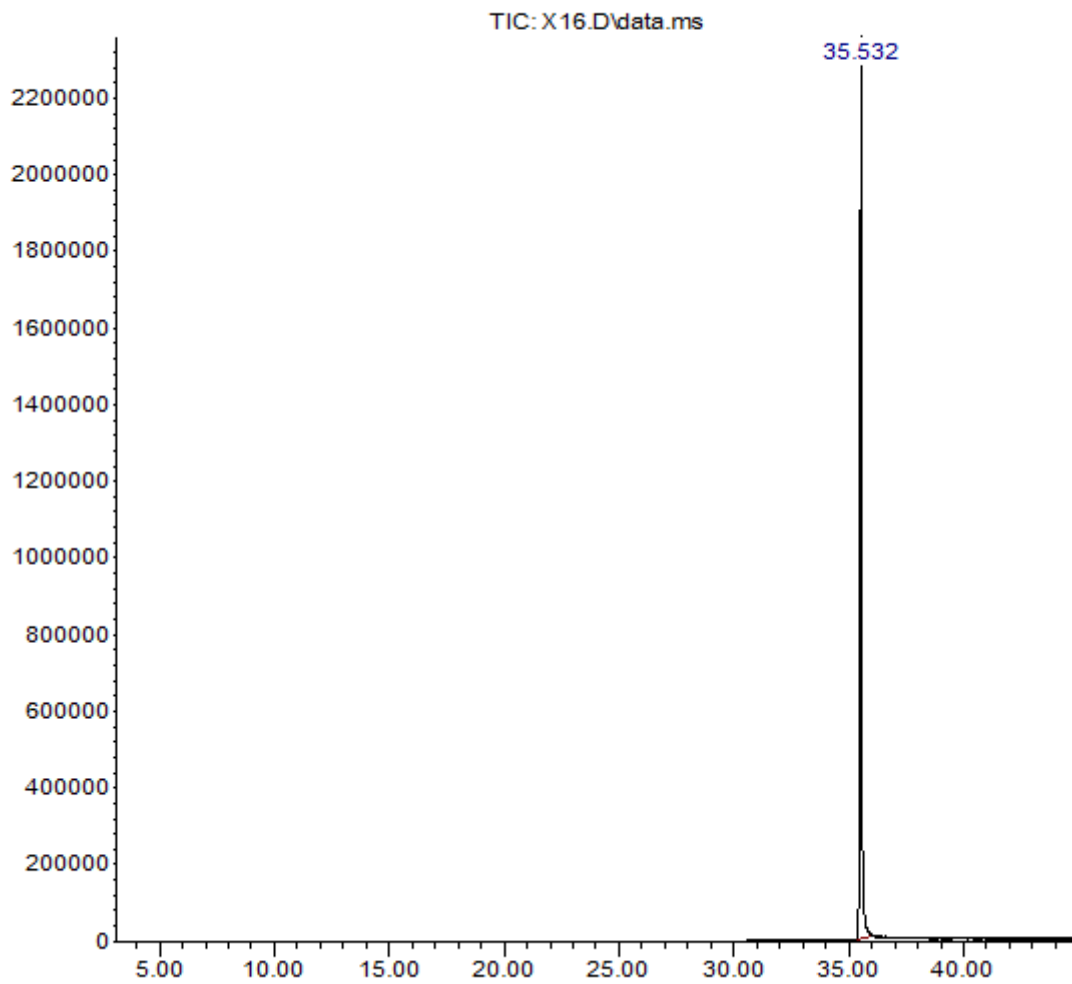

Time-->

Gas chromatogram of 3,3,6,6-Tetramethyl-9-(2-Thienyl)-1,8-dioxooctahydroanthene (X10)

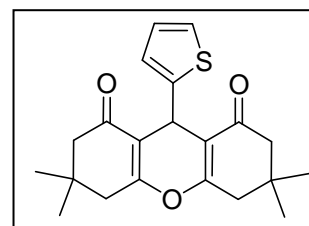

Abundance

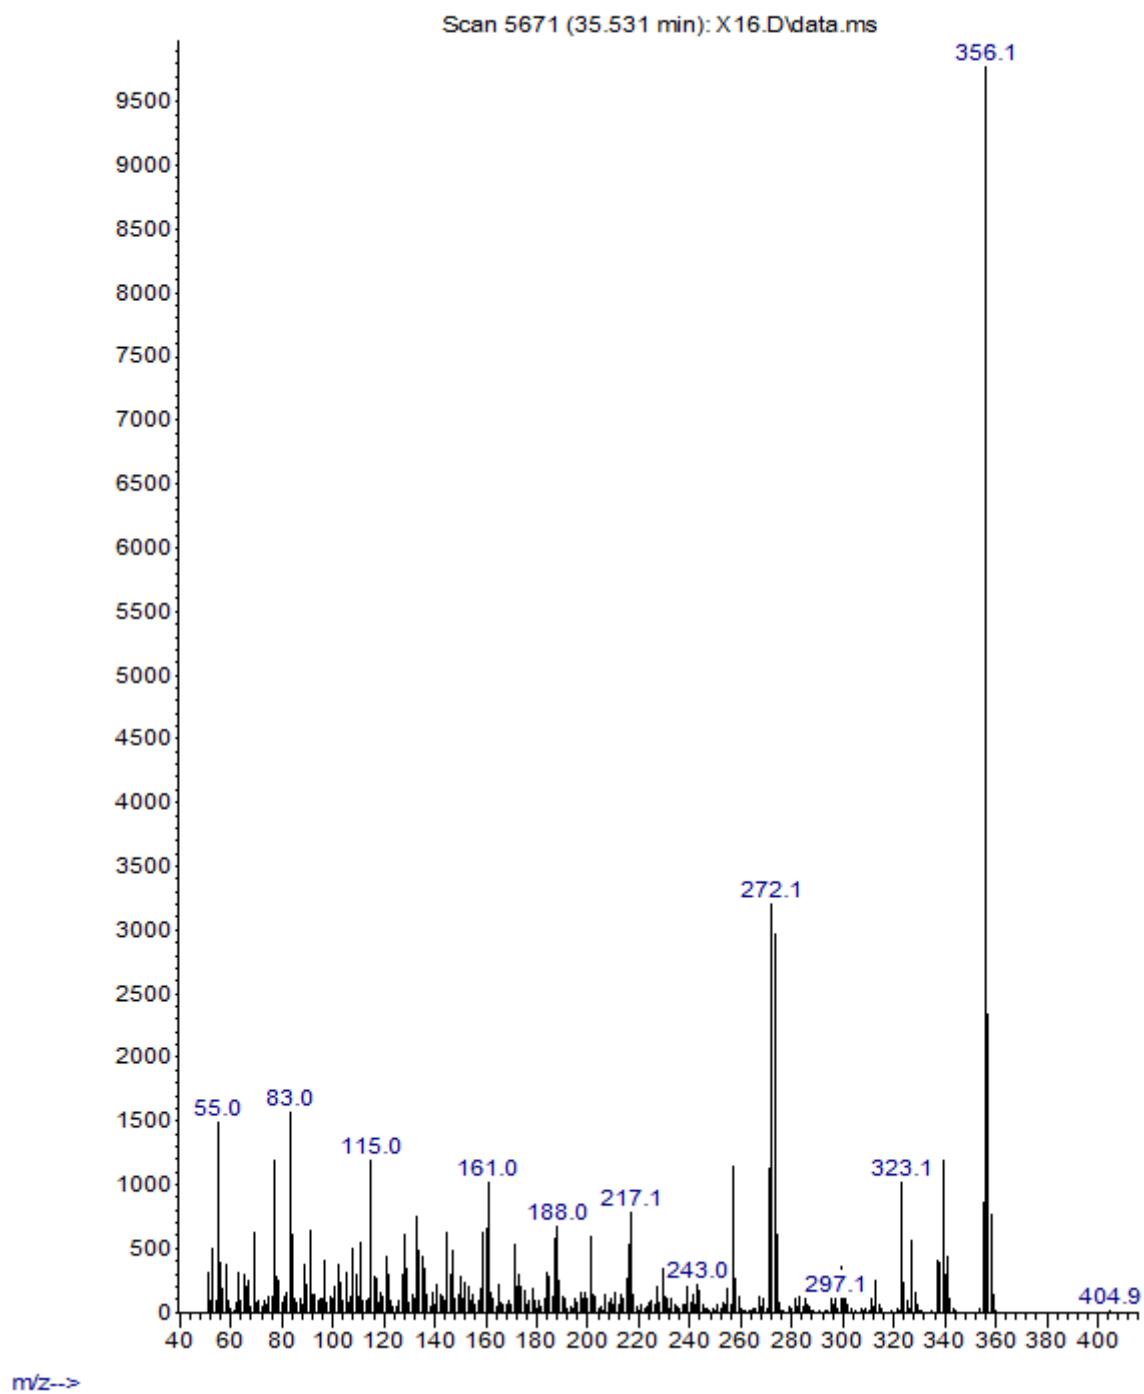

Mass spectrum of 3,3,6,6-Tetramethyl-9-(2-Thienyl)-1,8-dioxooctahydroxanthene (X10)

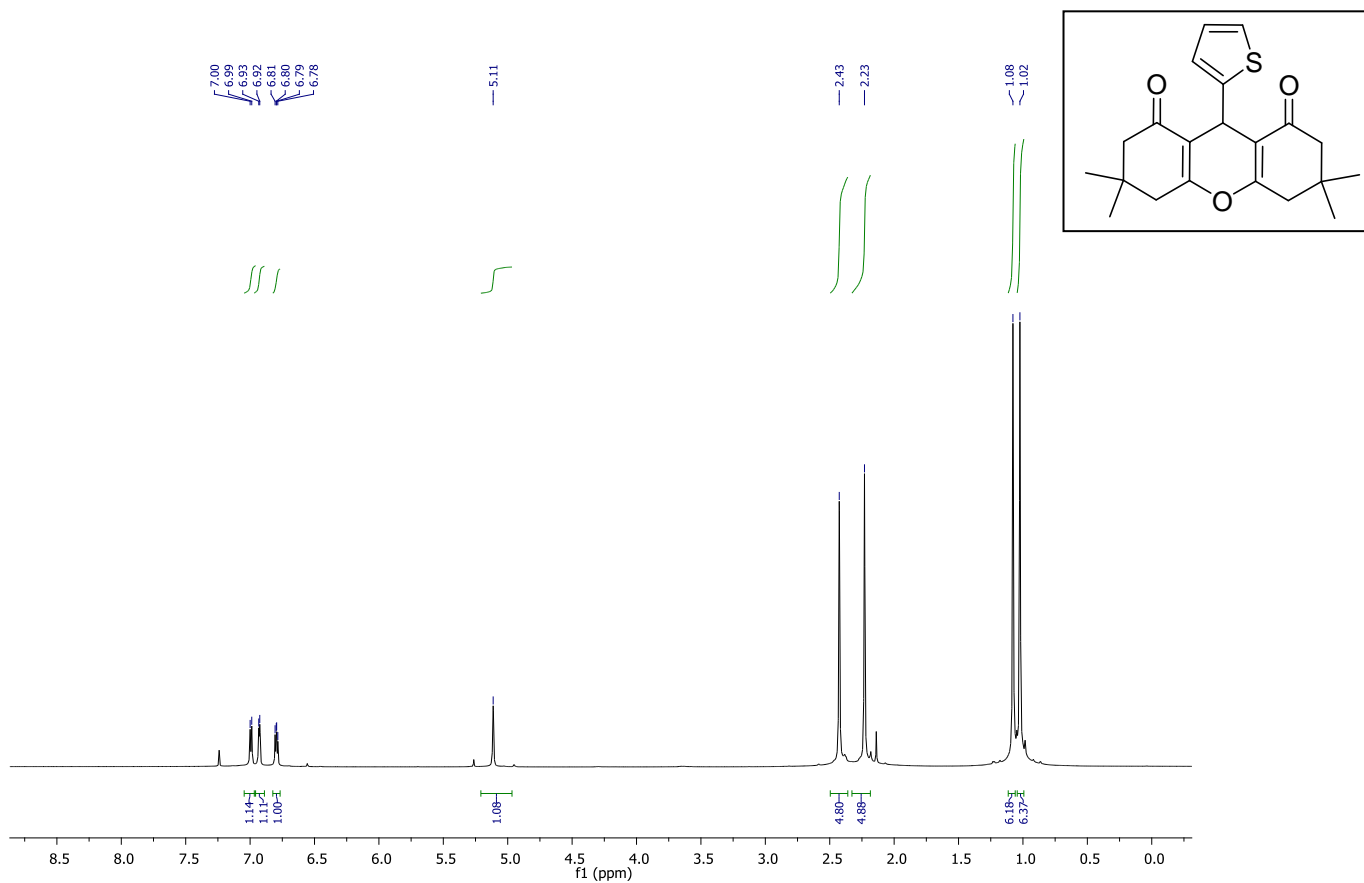

<sup>1</sup>H NMR spectrum of 3,3,6,6-Tetramethyl-9-(2-Thienyl)-1,8-dioxooctahydroanthene (X10)

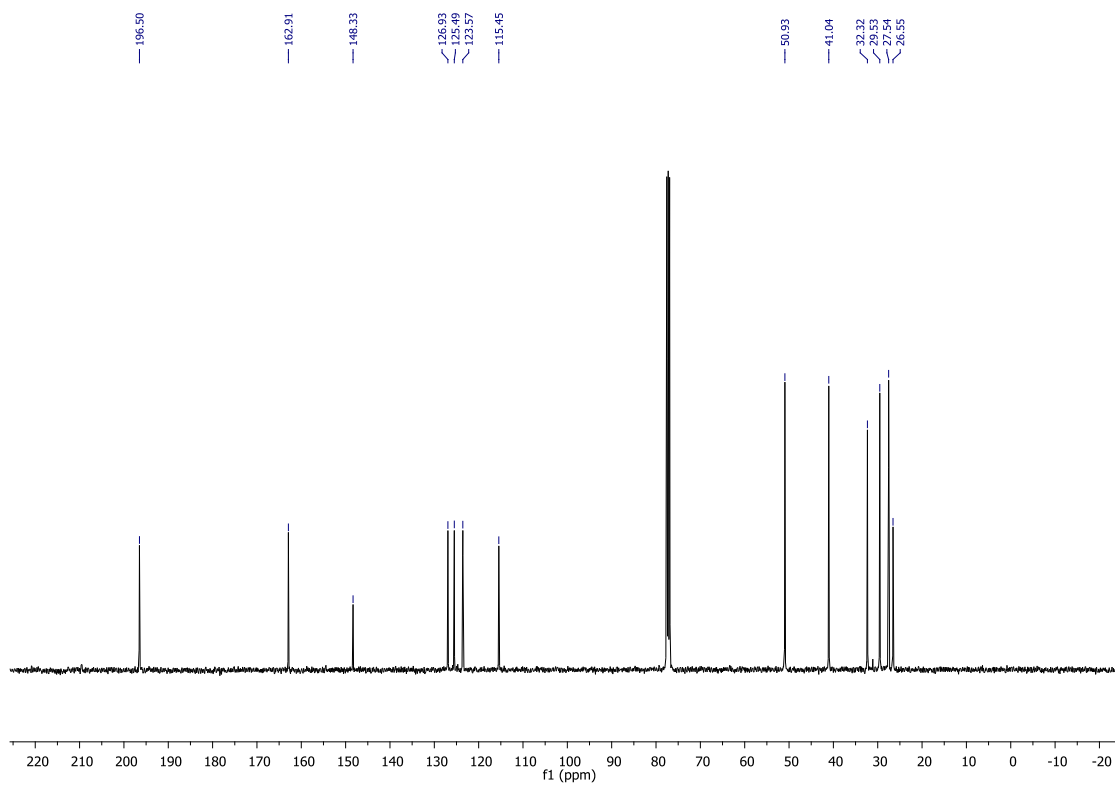

<sup>13</sup>C NMR spectrum of 3,3,6,6-Tetramethyl-9-(2-Thienyl)-1,8-dioxooctahydroanthene (X10)

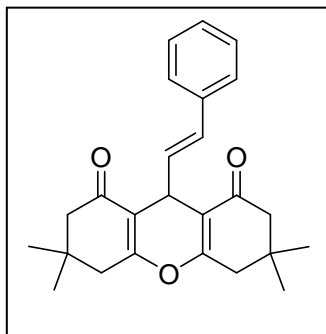

Abundance

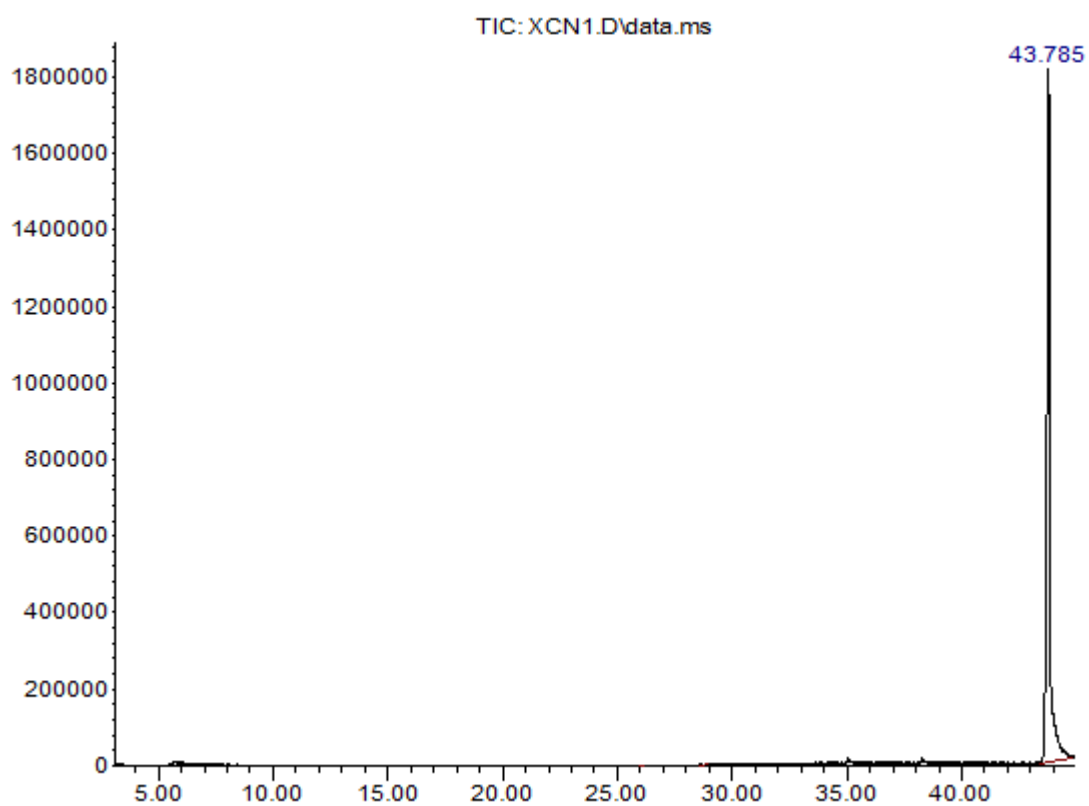

Time-->

Gas chromatogram of 3,3,6,6-Tetramethyl-9-(2-phenylethylene)-1,8-dioxooctahydroanthene (X11)

Abundance

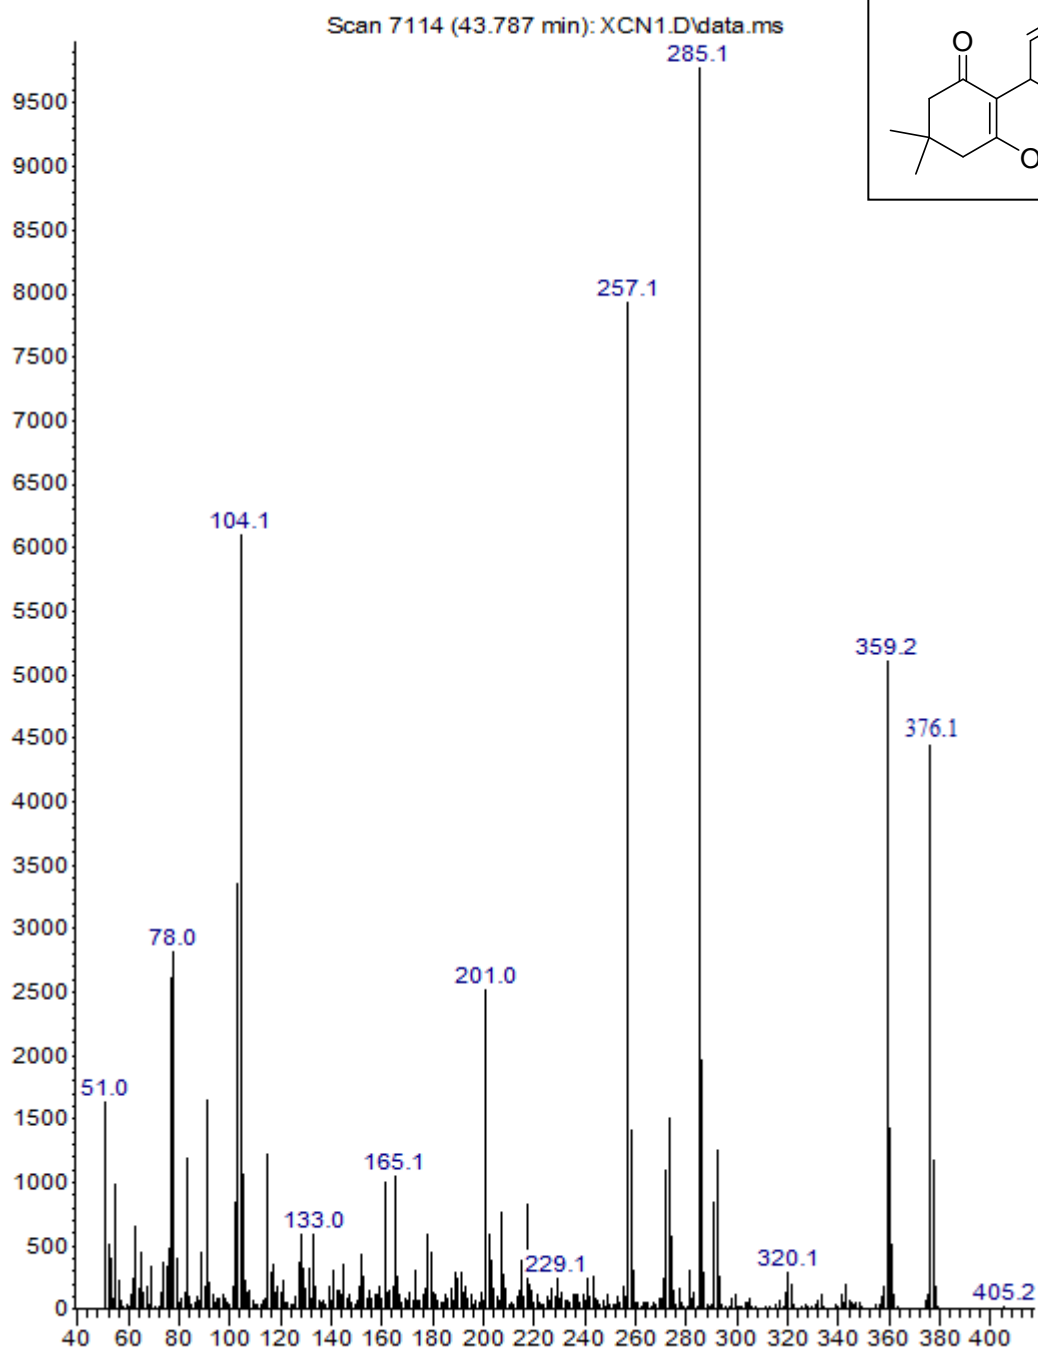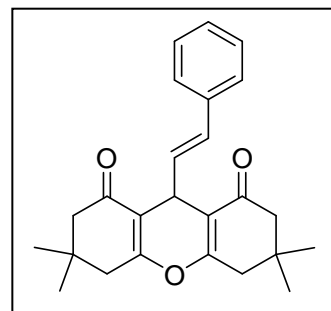

m/z-->

Mass spectrum of 3,3,6,6-Tetramethyl-9-(2-phenylethylene)-1,8-dioxooctahydroanthene (X11)

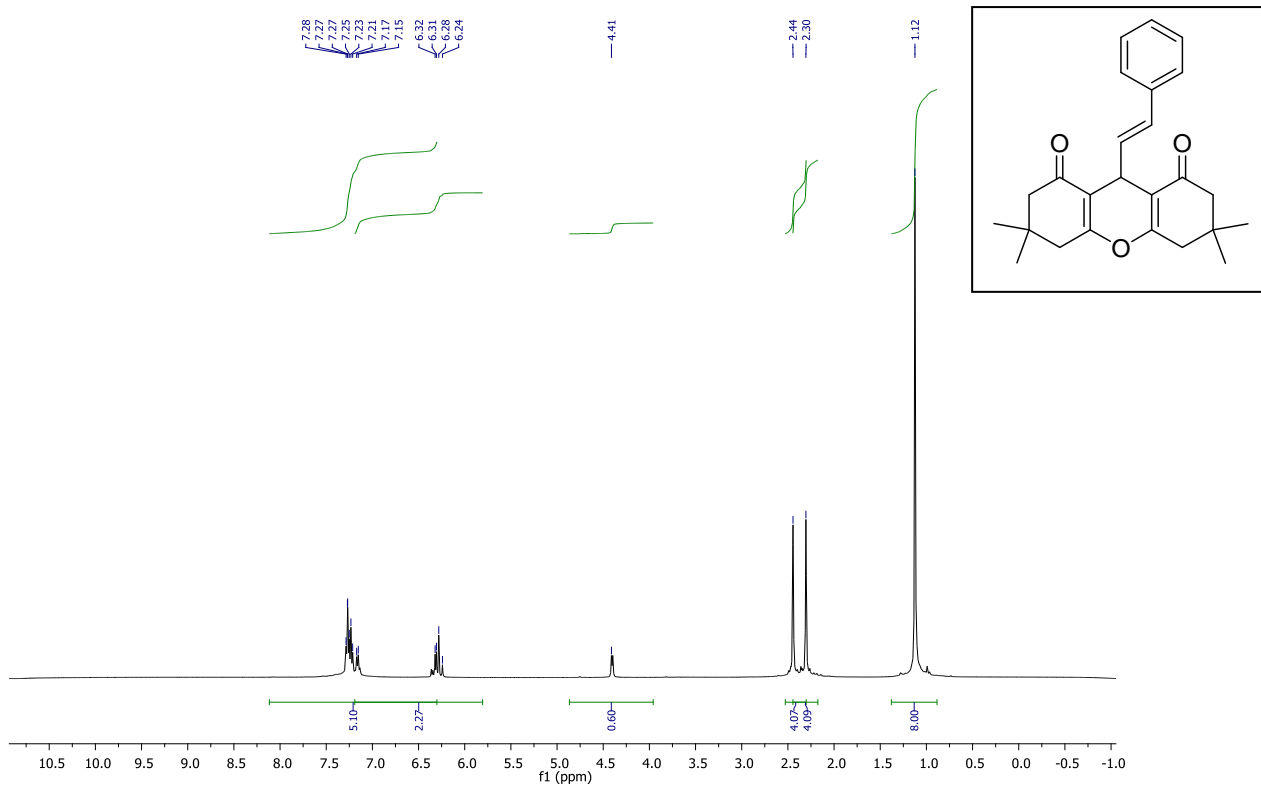

<sup>1</sup>H NMR spectrum of 3,3,6,6-Tetramethyl-9-(2-phenylethylene)-1,8-dioxooctahydroanthene (X11)

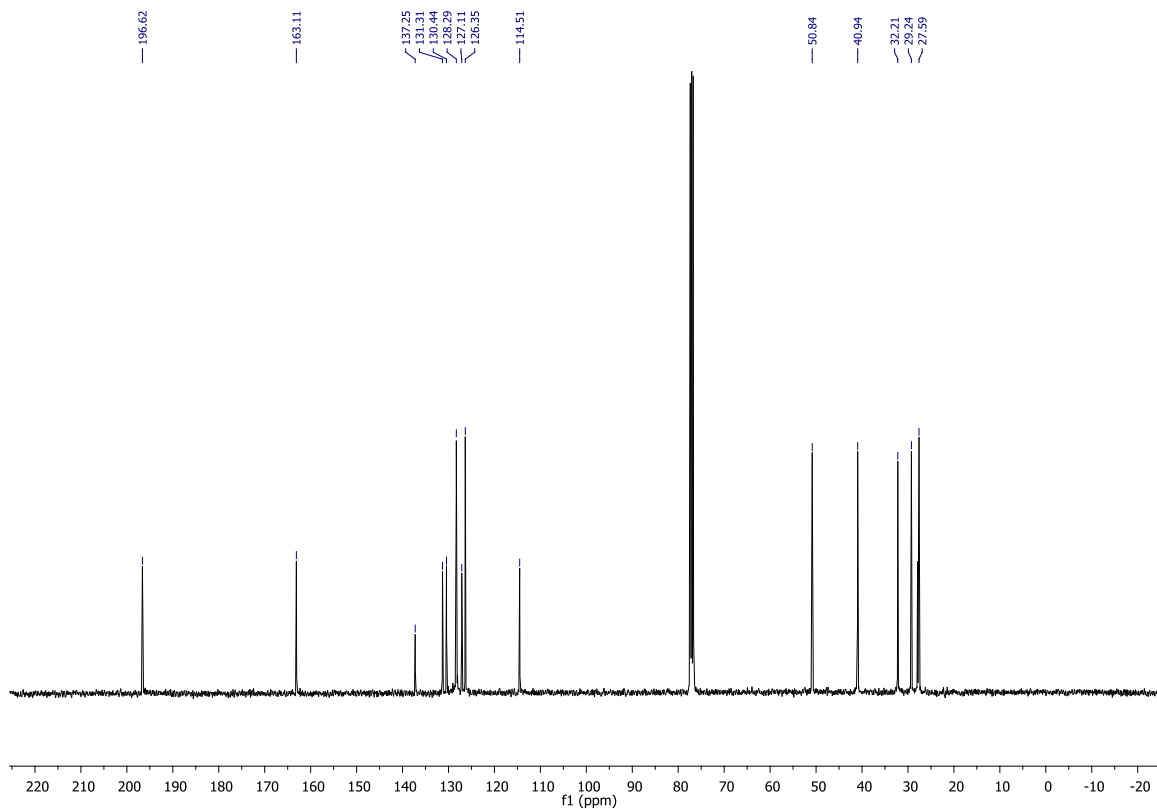

<sup>13</sup>C NMR spectrum of 3,3,6,6-Tetramethyl-9-(2-phenylethylene)-1,8-dioxooctahydroanthene (X11)

## References

1. A. Khazaei, A. R. Moosavi-Zare, Z. Mohammadi, A. Zare, V. Khakyzadeh, G. Darvishi, *RSC Adv.*, **2013**, *3*, 1323-1326 .
2. H. R. Shaterian, A. Hosseinian, M. Ghashang, *Phosphorus Sulfur Silicon Relat. Elem.*, **2008**, *183*, 3136–3144.
3. G. R. Chaudhary, P. Bansal, N. Kaur, S. K. Mehta, *RSC adv.*, **2014**, *4*, 49462-49470.
4. N. Mulakayala, G. P. Kumar, D. Rambabu, M. Aeluri, M. V. B. Rao, M. Pal, *Tetrahedron Lett.*, **2012**, *53*, 6923–6926.
5. T. Jin, J. Zhang, A. Wang, T. Li, *Ultrason. Sonochem.*, **2006**, *13*, 220–224.
